# Supplementary material for: Hijacking of transcriptional condensates by endogenous retroviruses
Source: PubMed Central journal article supplement (PMC9355880; doi:10.1038/s41588-022-01132-w), 2022-07-21

---

**Supplementary information**

---

**Hijacking of transcriptional condensates by endogenous retroviruses**

---

In the format provided by the authors and unedited

1 **SUPPLEMENTARY INFORMATION**

2

3

4 Hijacking of transcriptional condensates by endogenous retroviruses

5

6 Vahid Asimi<sup>1,2†</sup>, Abhishek Sampath Kumar<sup>1,3†</sup>, Henri Niskanen<sup>1†</sup>, Christina  
7 Riemenschneider<sup>1,3†</sup>, Sara Hetzel<sup>1</sup>, Julian Naderi<sup>1</sup>, Nina Fasching<sup>4</sup>, Niko Popitsch<sup>4</sup>, Manyu  
8 Du<sup>5,6</sup>, Helene Kretzmer<sup>1</sup>, Zachary D. Smith<sup>7,8</sup>, Raha Weigert<sup>1</sup>, Maria Walther<sup>1</sup>, Sainath  
9 Mamde<sup>1</sup>, David Meierhofer<sup>9</sup>, Lars Wittler<sup>10</sup>, Rene Buschow<sup>11</sup>, Bernd Timmermann<sup>12</sup>,  
10 Ibrahim I. Cisse<sup>5,6</sup>, Stefan L. Ameres<sup>4,13</sup>, Alexander Meissner<sup>1,7,8</sup>, Denes Hnisz<sup>1\*</sup>

11

12 \* Correspondence: [hnisz@molgen.mpg.de](mailto:hnisz@molgen.mpg.de)

13

14

15

16 **CONTENTS**

- 17 • Supplementary Methods
- 18 • Supplementary Figure Legends
- 19 • Supplementary Table Legends
- 20 • Supplementary References
- 21 • Supplementary Figures 1-11

22

23 Supplementary Data Files 1-3 and Source Data Files 1-5 are included separately.

## 24 **Supplementary Methods**

25

26

### 27 Generation of the TRIM28-FKBP iPSC line

28 To generate mouse secondary induced pluripotent stem cells (iPSCs), secondary MEFs that  
29 harbor Doxycycline (Dox) -inducible *Oct4*, *Sox2*, *Klf4* and *c-Myc* (OSKM) transgenes, and a  
30 NANOG::GFP reporter<sup>1</sup>, were reprogrammed. MEFs were seeded at a low density of about  
31 10,000-25,000 cells per well of a 12-well plate that was coated with 0.2% gelatin. Prior to  
32 induction of the transgenes, cells were synchronized with a 12-16h incubation in 2.5% FBS  
33 containing medium. Afterwards, the medium was switched to 15% FBS/LIF with 2µg/ml  
34 Doxycycline. Media was changed every day; colonies emerged after about a week and clonal  
35 iPSC lines were resolved within 2 weeks. The iPSC line with the TRIM28 FKBP knock-in  
36 alleles was generated as described above.

37

### 38 Inactivation of NANOG::GFP in the TRIM28-FKBP iPSC line

39 For immunofluorescence combined with RNA FISH experiments (Fig. 3f, Extended Data Fig.  
40 5c), GFP at the *Nanog::GFP* locus was inactivated by targeting with a guide RNA  
41 (Supplementary Table 1b) against the GFP sequence. CRISPR-Cas9-guide RNA  
42 Ribonucleoprotein complex (RNPs) was assembled following the manufacturer's guidelines  
43 (Alt-R CRISPR; IDT). Briefly, 2µl each of 200µM of crRNA and 200µM of tracrRNA was  
44 mixed and denatured at 95°C for 5 minutes, and allowed to anneal while cooling down at room  
45 temperature for 20 minutes. 3µl of crRNA-tracrRNA was mixed with 1µl of 61µM Cas9 for  
46 20 minutes prior to transfection. TRIM28-FKBP iPSCs were transfected with the assembled  
47 RNPs by nucleofection using Amaxa 4D Nucleofector X Unit (Lonza) according to the  
48 manufacturer's instructions. The cells were then sorted for non-GFP cells using flow  
49 cytometry. The sorted cells were expanded and cultured as a clonal line.

50

### 51 Generation of shRNA knockdown mESC line for IAPEz and IAPEz/MMERVK10C/ 52 /MMERVK9C/ MMETn

53 shRNA against the repeat elements were designed using the consensus sequence of the inner  
54 part of each element. shRNA sequences are listed in Supplementary Table 1b. shRNA  
55 sequences were cloned into an inducible plasmid following the standard cloning protocol  
56 recommended for this vector. Lentiviruses with the shRNA constructs were generated by

57 transfecting HEK293 cells along with packaging and envelope plasmids. TRIM28-FKBP  
58 mESCs were transduced with the virus with 8 $\mu$ g /mL polybrene for 48 hours followed by  
59 treatment with 2 $\mu$ g/ml puromycin to select for the transduced cells. Single colonies were  
60 picked, characterized and expanded as a clonal line for IAPEZ and as a bulk line for the  
61 quadruple knockdown line for IAPEZ, MMERVK10C, MMERVK9C, MMETn. shRNA  
62 expression was induced by treatment with 2 $\mu$ g/ml Doxycycline. For the experiment with pre-  
63 induction of shRNAs (Fig. 4a-d, Extended Data Fig. 6e-h), the cells were treated for 24 hours  
64 with Doxycycline followed by DMSO, dTAG-13, or Dox+dTAG-13 for another 24 hours. Tet-  
65 pLKO-puro was a gift from Dmitri Wiederschain (Novartis, Cambridge US) (Addgene plasmid  
66 # 21915). psPAX2 was a gift from Didier Trono (EPFL Lausanne) (Addgene plasmid # 12260).  
67 pCMV-VSV-G was a gift from Bob Weinberg (WIBR, Cambridge US) (Addgene plasmid #  
68 8454). S2 work was performed following all relevant guidelines and regulations, approved by  
69 the Max Planck Institute for Molecular Genetics and the local authorities LAGeSo, Berlin  
70 (license number: 222/15-17a).

71

#### 72 Integration of PiggyBac transposon encoding Dox-inducible ERVs

73 The PB-tetO-lox-GFPpA-lox-IAPEZ, and -MMERVK10C constructs (Dox-inducible GFP)  
74 were created by digesting an “all-in-one” PiggyBac, TREG/Tet-3G plasmid (Addgene plasmid  
75 # 97421; a gift from Steven Carr & Samuel [Broad Institute, Cambridge US]) with restriction  
76 enzymes NcoI and KpnI and cloning the PB\_ATG\_GFP oligonucleotide to insert a start-codon  
77 “ATG” in front of the existing GFP via NEBuilder HiFi Assembly according to manufacturer’s  
78 instructions. To integrate the loxP sites, the plasmid was digested with NheI and BamHI and  
79 integrated the sequences loxP\_upstream and loxP\_downstream were integrated. To integrate  
80 various IAP and MMERVK10C sequences, sequences from gDNA were amplified with  
81 primers binding in conserved regions of the ERVs and overhangs to the PiggyBac plasmid.  
82 After size selection (~900bp) fragments were cloned into the PiggyBac construct by cutting  
83 with BamHI and cloning via NEBuilder HiFi Assembly according to the manufacturer’s  
84 instructions. The constructs were randomly integrated in the mESC V6.5 Trim28-FKBP  
85 subclone by co-transfecting 4x10<sup>5</sup> cells with 8.5 $\mu$ g PB-tetO-lox-GFPpA-lox-IAPEZ, or -  
86 MMERVK10C and 1.5 $\mu$ g Super PiggyBac transposase expression vector (SBI, PB210PA-1)  
87 using FuGENE HD Transfection Reagent (Promega). After 4 days of Puromycin selection  
88 (2 $\mu$ g/ml) single colonies were picked, expanded and tested for doxycycline-inducibility of the  
89 GFP construct monitored by GFP detection with FACS. Clones expressing high levels of GFP  
90 were selected and expanded for subsequent experiments. A plasmid encoding Cre recombinase

91 was transfected to catalyze recombination between the two homologous loxP sites, removing  
92 the GFP sequence to generate isogenic cell lines, with the same copy number and insertion  
93 sites of either GFP or IAPEz/MMERVK10C. The sequence of GFP until the polyA is about  
94 ~900bp long and comparable with the length of the IAPEz and MMERVK10C sequences.

95

#### 96 Deletion of ERVs in the TRIM28-FKBP mESC line

97 To generate a TRIM28-FKBP mESC line with three ERV deletions at the *Cthrc1* locus,  
98 deletions of MMETn, MMERVK and IAP sequences were performed sequentially with  
99 CRISPR/Cas9. Guide RNAs ([Supplementary Table 1b](#)) flanking the individual ERV elements  
100 were cloned into the sgRNA-Cas9 vector pX458 and the two vectors for each cut were  
101 delivered to cells with Lipofectamine 2000 (Thermo Fisher, 11668027) according to  
102 manufacturer's instructions. Transfected cells were sorted based on GFP expression two days  
103 later with flow cytometry. Single colonies were picked, genotyped ([Supplementary Fig. 6b](#))  
104 and clones with homozygous deletion were selected for the next ERV deletion. Deletions were  
105 also confirmed by sequencing the PCR products.

106

#### 107 Differentiation of TRIM28-FKBP mESCs to EpiSCs (epiblast stem cells)

108 TRIM28-FKBP mESCs were feeder depleted and cultured for two passages under standard  
109 ESC culture conditions with 2000 U/mL LIF in 0.2% gelatin-coated 6cm dishes (Corning).  
110 6cm dishes were coated with 10ng/mL human plasma fibronectin (Merck) and incubated  
111 overnight at 37°C one day prior to differentiation to EpiSCs. ESCs were disaggregated for 5  
112 minutes with Accutase (Sigma), washed twice with 1X PBS, and seeded at a density of  $1 \times 10^6$   
113 cells per 6cm dish on fibronectin coated plates with EpiSC media containing DMEM/F12,  
114 N2B27, 1% KSR, 0.5% BSA fraction V, 1X GlutaMAX supplement, 1X non-essential amino  
115 acids, and 0.05mM  $\beta$ -mercaptoethanol (R&D systems). Cells were cultured for 48–72 hours or  
116 until morphological changes were observed. At this stage, cells were passaged using a  
117 combination of TrypLE for 3 minutes and scraping with cell scrapers (Corning). EpiSCs were  
118 characterized for morphology and marker gene expression after two passages ([Supplementary](#)  
119 [Fig. 2e](#)). EpiSCs were passaged in clumps.

120

#### 121 Differentiation of TRIM28-FKBP mESCs to iXEN (induced extra-embryonic stem cells)

122 TRIM28-FKBP mESCs were feeder depleted and grown on 0.2% gelatin-coated 6cm dishes  
123 for two passages under standard ESC culture conditions with 2000U/mL LIF. Cells were  
124 dissociated with 0.05 percent Trypsin (Sigma) for 4 minutes and seeded at a density of  $5 \times 10^5$

125 cells on a 0.2 percent gelatin coated 6cm dish with standard XEN cell media (RPMI-1640  
126 9Invitrogen), 15% FBS (Pan biotech), 1X GlutaMAX supplement (Gibco), 1X non-essential  
127 amino acids (Gibco), 0.1mM  $\beta$ -mercaptoethanol (Gibco), 0.01 $\mu$ M all-trans retinoic acid  
128 (sigma) and 10ng/mL Activin A (R&D systems). Cells were passaged every 3-4 days in  
129 standard XEN media until XEN-like colonies emerged. Flow cytometry was used to determine  
130 the expression of PDGFRA (1:1000, 135923, BioLegend) in iXEN cells ([Supplementary Fig.](#)  
131 [2f](#)).

132

### 133 Differentiation of TRIM28-FKBP mESCs to NPCs (neural progenitor cells)

134 mESCs were feeder depleted and grown under standard ESC culture conditions with 2000 U/ml  
135 LIF for 5-7 days on 0.2% gelatin-coated T25 flasks (TPP). One day before neural progenitor  
136 cell (NPC) monolayer differentiation started, the cells were trypsinized using 0.05% Trypsin  
137 (Gibco, # 25300-054) for 5 min at 37°C, counted and cultured for 24 hours at high density (3-  
138  $3.5 \times 10^6$  per T25) in ESGRO Complete Clonal Grade Medium (Millipore, #SF001-B) +1000  
139 U/ml LIF. On day 1 of differentiation cells were trypsinized as described above, washed once  
140 with PBS and plated onto 0.1% gelatin-coated 10 cm dishes (Corning) in RHB-A medium  
141 (Takara-Clontech, #Y40001) with  $1.6 \times 10^6$  cells/dish. The medium was changed on days 2 and  
142 3 of differentiation. On day 4 of differentiation, the cells were replated on PDL/Laminin-coated  
143 10 cm dishes at a density of  $2 \times 10^6$  cells/dish in RHB medium + bFGF (Thermo, #PHG0261).  
144 NPCs were passaged every 3 days. The dTAG treatment was performed at passage 4. Cell  
145 pellets were collected 2, 6, 24 and 96 hours post dTAG treatment initiation. DMSO-treated  
146 NPCs served as a control and were collected parallelly at corresponding time points.

147

### 148 Aggregation of mouse embryonic stem cells by tetraploid complementation

149 TRIM28-FKBP mESCs were thawed and cultured on a layer of CD-1 feeders. Prior to the  
150 complementation assay, cells were treated with either 500nM dTAG-13 or DMSO for 24 hours.  
151 Tetraploid complementation was performed as previously described<sup>2</sup>. For the duration of the  
152 assay, dTAG-13/DMSO was added to KSOM media. The expression of mRUBY was imaged  
153 in blastocyst stage embryos using an AxioZoom microscope (ZEISS) ([Supplementary Fig. 2h-](#)  
154 [i](#)).

155

### 156 Western blot

157 Cultured cells were lysed in RIPA buffer for 30 minutes at 4°C, and centrifuged for 20 minutes  
158 at maximum speed. The supernatant was then transferred to a new tube and quantified by BCA

159 assay (Thermo Scientific). 10µg of extracted protein was run on a 4-12% NuPAGE SDS gel  
160 and transferred onto a PVDF membrane using iBlot2 Dry Gel Transfer Device (Invitrogen)  
161 according to manufacturer's instructions. The blots were blocked with 5% skim milk in TBST  
162 and incubated with primary antibodies. Primary antibodies used in this study include TRIM28  
163 (ab22553; 1:500), ACTB (ab8226; 1:1000), OCT4 (ab19857; 1:500), OCT4 (sc-5279; 1:500),  
164 HSP90 (BD610419; 1:4000), SOX2 (ab79351; 1:500). HRP-conjugated secondary antibodies  
165 (115-035-174, 211-032-171, Jackson Immuno) were used against the host species at 1:3000 –  
166 1:5000 dilution and visualized with HRP substrate SuperSignal West Dura (Thermo Scientific)  
167 (Fig. 1d, 3b, Extended Data Fig. 5a, 8a, Supplementary Fig 2b, 2m).

168

### 169 Proteomics Sample Preparation and LC-MS/MS Instrument Settings for Shotgun Proteome 170 Profiling and Data Analysis

171 Proteomics sample preparation was done according to a published protocol with minor  
172 modifications<sup>3</sup>. In brief, three biological replicates of dTAG-13 -treated samples with 4 million  
173 cells per replicate were lysed under denaturing conditions and sequentially digested with LysC  
174 and Trypsin (Roche, Basel, Switzerland). Peptide desalting was performed according to the  
175 manufacturer's instructions (Pierce C18 Tips, Thermo Scientific, Waltham, MA). Desalted  
176 peptides were further separated into four fractions by strong cation exchange chromatography  
177 (SCX, 3M Purification, Meriden, CT). LC-MS/MS was carried out by nanoflow reverse phase  
178 liquid chromatography (Dionex Ultimate 3000, Thermo Scientific) coupled online to a Q-  
179 Exactive HF Orbitrap mass spectrometer (Thermo Scientific), as reported previously<sup>4</sup>. Briefly,  
180 the LC separation was performed using a PicoFrit analytical column (75 µm ID × 50 cm long,  
181 15 µm Tip ID; New Objectives, Woburn, MA) in-house packed with 3-µm C18 resin (Reprosil-  
182 AQ Pur, Dr. Maisch, Ammerbuch, Germany). Raw MS data were processed with MaxQuant  
183 software (v1.6.10.43) and searched against the mouse proteome database UniProtKB with  
184 55,471 entries, released in May 2020. The MaxQuant processed output files can be found in  
185 (Supplemental Table 3), showing peptide and protein identification, accession numbers, %  
186 sequence coverage of the protein, q-values, and label-free quantification (LFQ) intensities. The  
187 mass spectrometry data have been deposited to the ProteomeXchange Consortium  
188 (<http://proteomecentral.proteomexchange.org>) via the PRIDE<sup>5</sup> partner repository with the  
189 dataset identifier PDX021895. The correlation analysis of biological replicates and the  
190 calculation of significantly different proteins were done with Perseus (v1.6.14.0). Only groups  
191 with valid values in at least one group were used, missing values were replaced by values from  
192 the normal distribution. Statistical analysis was done by a two-sample t-test with Benjamini-

193 Hochberg (BH, FDR of 0.05) correction for multiple testing ([Extended Data Fig. 5d](#),  
194 [Supplementary Fig. 2c](#)).

195

#### 196 RNA isolation and quantitative Real-Time PCR (qRT-PCR)

197 RNA from cultured cells was isolated using RNeasy kit (Qiagen) according to manufacturer's  
198 instructions. 1µg of RNA was used for cDNA synthesis using RevertAid First Strand cDNA  
199 synthesis kit (Thermo Scientific) with random hexamer primers according to manufacturer's  
200 instructions. RNA from single blastocysts (E3.5) was isolated using PicoPure RNA isolation  
201 kit (Thermo Fischer Scientific) and cDNA was synthesized with High-Capacity cDNA Reverse  
202 Transcription kit (Applied Biosystems). qRT-PCR was performed with primers  
203 ([Supplementary Table 1b](#)) and 2X PowerUP SYBR green master mix (Applied Biosystems).  
204 Note that in [Fig. 4a-b](#), and [Extended Data Fig 6a-f](#), the qPCR primers used for MMETn and  
205 MMERVK9C elements fail to detect induction after dTAG-13 treatment, which is explained  
206 by these elements having degenerate genomic sequences.

207

#### 208 Immunofluorescence (IF) in mouse embryos and blastocysts

209 E3.5 blastocysts and E6.5 embryos were dissected from the uterus in 1X HBBS and fixed in  
210 4% Paraformaldehyde (PFA) at 4°C overnight. The embryos were washed three times in 1X  
211 PBS with 0.1% TritonX-100 and then permeabilized in 1X SuperBlock PBS with 0.5%  
212 TritonX-100 for one hour at room temperature. Blocking against unspecific binding was done  
213 by incubating embryos in blocking buffer (1X SuperBlock PBS with 0.2% TritonX-100, 10%  
214 Donkey Serum, 3% Bovine Serum Albumin) for two hours at room temperature. Primary  
215 antibodies were diluted in antibody buffer (1X SuperBlock PBS with 0.2% TritonX-100, 10%  
216 Donkey Serum, 0.3% Bovine Serum Albumin) and incubated at 4 °C overnight. Primary  
217 antibodies used include TRIM28 (ab22553; 1:200), OCT4 (ab19857; 1:200), NANOG (REC-  
218 RCAB002P-F; 1:400), KLF4 (AF3158; 1:200), SOX2 (ab79351; 1:200), GATA6 (AF1700;  
219 1:200), GATA4 (sc-25310; 1:200), SOX17 (AF1924; 1:200), IAP-GAG (MBS8566075;  
220 1:100). Embryos were washed in blocking buffer three times for 30 minutes each and incubated  
221 with host-specific secondary antibodies conjugated to fluorescent dyes for three hours in the  
222 dark at room temperature (Donkey anti-Rabbit-Alexa 488 (1:400, A21206, Invitrogen),  
223 Donkey anti-Rabbit-Alexa647 (1:400, 711-605-152, Jackson Immuno), Donkey anti-Mouse-  
224 Alexa 488 (1:400, A21202, Invitrogen), Donkey anti-Mouse-Alexa 647 (1:400, 715-605-150,  
225 Jackson Immuno), Donkey anti-Goat-Alexa 594 (1:400, A11058, Invitrogen), Donkey anti-  
226 Goat-Alexa 647 (1:400, 705-605-147, Jackson Immuno). After washing with blocking buffer,



227 nuclei were counterstained with 0.5µg/mL DAPI for 30 minutes in the dark at room  
228 temperature. Embryos were mounted in drops of 1X PBS and covered with mineral oil prior to  
229 imaging. Images were acquired with LSM880 (Zeiss) microscope with a 40X objective. Images  
230 were processed with and ImageJ (version 2.1.0/1.53i) (Fig. 5b, 5g Supplementary Fig. 10a-b).

231

#### 232 SSEA-1 staining

233 Cultured cells were dissociated into single-cells with Accutase enzyme mix, washed in 1X PBS  
234 and fixed with 4% PFA for 15 minutes at room temperature. Following three washes with 1X  
235 PBS, the cells were incubated with fluorescent conjugated SSEA-1 antibody (BioLegend  
236 125608, 125609; 1:1000) for one hour in the dark at 37°C. After three washes in 1X PBS,  
237 nuclei were counterstained with 0.24 µg/ml DAPI and imaged with LSM880 confocal  
238 microscope at 63X oil objective (Supplementary Fig. 2j-k). For FACS analysis, the cells were  
239 washed two times in 1X PBS+10%FBS and analyzed with BD FACS Celesta (Supplementary  
240 Fig. 2i, 11a). Data was recorded with FACS Diva software and analyzed with FlowJo software  
241 (version 10.7)

242

#### 243 RNA-FISH

244 TRIM28-FKBP iPSCs were seeded onto 0.2% gelatin-coated plates prior to treatment. For the  
245 treatment, 500nM of dTAG-13 and/or 2µg/ml Doxycycline was mixed with the media and  
246 incubated for the indicated durations. RNA-FISH was performed on glass coverslips coated  
247 with Poly-L-Lysine (Sigma-Aldrich) prior to seeding. Cells were dissociated with Accutase  
248 enzyme mix (Sigma-Aldrich), washed in 1X PBS, resuspended in a minimal volume of ESC  
249 media. 10-20µL drops of cells were added to the coverslips and were allowed to attach for 10  
250 minutes at room temperature. 4% PFA fixation for 15 minutes was followed by two 1X PBS  
251 washes and permeabilized in 70% ethanol at 4°C overnight. RNA-FISH was performed with  
252 reagents from the Stellaris RNA-FISH method (LGC Technologies) following the  
253 manufacturer's instructions. Hybridization was performed with an oligo probe that was labeled  
254 with Cy5 dye at the 5'end (TTCTTGATGTCCTAACCCCTTTTCCTTC). After the final wash,  
255 the coverslips were mounted onto glass slides with ProLong Gold Anti-fade (Invitrogen)  
256 mounting media. Images were acquired with Z1 Observer (Zeiss) microscope at 100X  
257 magnification. Images were processed with ZEN 2.3 version 2.3.69.1016 (Zeiss) and ImageJ  
258 software version 2.1.0/1.53i (Fig. 3c-d).

259

260

## 261 Subcellular Fractionation and RNA-Isolation

262 A total of  $1 \times 10^6$  cells was washed with ice-cold PBS, resuspended in 100  $\mu$ l of Cytoplasmic  
263 Extraction Buffer (CEB) and RiboLock RNase-Inhibitor (Thermo Fisher, EO0382), incubated  
264 at 4°C for 10 min with gentle mixing. On centrifugation at  $500 \times g$  for 5 min, the supernatant  
265 (cytoplasmic extract) was transferred to a new pre-chilled tube. Pellet was resuspended in 50 $\mu$ l  
266 ice-cold Nuclear Extraction Buffer (NEB) and RiboLock RNase-Inhibitor (Thermo Fisher,  
267 EO0382), vortexed on the highest setting for 15 sec, incubated at 4°C for 30 min with gentle  
268 mixing, centrifuged 5000 x g for 5 min, and supernatant (nuclear extract) was transferred to a  
269 new tube for RNA extraction. CEB and NEB buffers are from the Subcellular Fractionation  
270 Kit (Thermo Fisher, 78840). For controlling the quality of RNA isolation, cDNA synthesis and  
271 PCR amplification we spiked in 10pg of a 500nt long *in vitro* transcribed RNA of *Ttn* to each  
272 fraction. RNA from cytoplasmic and nuclear fraction was isolated using miRNeasy Micro Kit  
273 (Qiagen) according to manufacturer's instructions, eluted in 25 $\mu$ l. 10 $\mu$ l of RNA from each  
274 fraction was used for cDNA synthesis using RevertAid First Strand cDNA synthesis kit  
275 (Thermo Scientific) with random hexamer primers according to manufacturer's instructions.  
276 qRT-PCR was performed with primers ([Supplementary Table 1b](#)) and 2X PowerUP SYBR  
277 green master mix (Applied Biosystems) ([Extended Data Fig. 9f](#)).

278

## 279 TrueSeq Stranded mRNA-seq

280 mESCs were cultured with either DMSO or 500 nM dTAG-13 for 2, 6, 24 and 96 hours. RNA  
281 was isolated using RNeasy kit (Qiagen) and 1 $\mu$ g of RNA was used for preparing the libraries.  
282 TrueSeq Stranded mRNA capture kit was used to prepare the libraries (KAPA biosystems)  
283 according to manufacturer's instructions. Unique Dual-Indexed (UDI; KAPA biosystems)  
284 adapters were ligated and the library was amplified for 8 cycles. The libraries were then  
285 sequenced as Paired-end 100 (PE100) on a Novaseq6000 with 50 million fragments per library.

286

## 287 Total RNA-seq

288 Doxycycline was used to pre-treat shRNA cell lines for 24 hours, followed by another 24 hours  
289 of treatment with DMSO, dTAG-13, or dTAG-13+Doxycycline. The RNeasy kit (Qiagen) was  
290 used to isolate RNA, and 1 $\mu$ g of RNA was used to prepare the libraries. Total RNAseq libraries  
291 were prepared according to the manufacturer's instructions using the KAPA RNA HyperPrep  
292 kit (KAPA biosystems). As recommended by the protocol, ribosomal RNA was depleted using  
293 the RiboErase (HMR) kit (KAPA biosystems). The library was ligated to Unique Dual-Indexed  
294 (UDI; KAPA biosystems) adapters and amplified for 9 cycles. The libraries were then

295 sequenced as Paired-end 100 (PE100) with a minimum of 50 million fragments per library on  
296 a Novaseq6000.

297

### 298 H3K27Ac and H3K9me3 Chromatin immunoprecipitation -sequencing (ChIP-Seq)

299 For ChIP-Seq experiments, DMSO and dTAG-13 treated cells were detached with TrypLE  
300 Express (Gibco), washed once with PBS, fixed in rotation with 1 % formaldehyde for 10  
301 minutes in room temperature followed by 5 minutes of quenching with 125 mM glycine. For  
302 H3K27Ac and H3K9me3 ChIPs, three million mESCs were used per replicate sample, and  
303 750,000 S2 cells were added for exogenous genome spike-in normalization<sup>6</sup>. Cells were lysed  
304 in LB1 (50 mM HEPES-KOH, 140 mM NaCl, 1 mM EDTA, 10 % glycerol, 0.5 % Igepal CA-  
305 630 and 0.25 % Triton X-100, 5 mM Na-butyrate and 1x protease inhibitor cocktail) and  
306 collected by centrifugation. Lysis was continued in LB2 (10 mM Tris-HCl pH 8.0, 200 mM  
307 NaCl, 1 mM EDTA, 0.5 mM EGTA, 5 mM Na-buturate and 1x protease inhibitor cocktail)  
308 followed by centrifugation. Nuclei were lysed in LB3 (10 mM Tris-HCl pH 8.0, 100 mM NaCl,  
309 1 mM EDTA, 0.5 mM EGTA, 0.1 % Na-deoxycholate, 0.5 % N-Lauroylsarcosine, 5 mM Na-  
310 butyrate and 1x protease inhibitor cocktail) and chromatin was fragmented with Bioruptor  
311 NextGen for 35 cycles (high setting). Lysates were clarified and 10 % of the sample was set  
312 aside as input. The remaining sample was split in two to capture protein-DNA complexes with  
313 1µg H3K27Ac (ab4729; Abcam) and 1µg H3K9me3 (ab8898; Abcam) antibodies by  
314 incubating them in rotation overnight in 4 °C. This was followed by 24 hours of incubation  
315 with Protein A Dynabeads (Invitrogen) that had been washed three times with 0.25 % BSA in  
316 PBS. Beads from immunoprecipitation were washed 7 times with RIPA buffer (50 mM  
317 HEPES-KOH pH7.5, 1 mM EDTA, 1 % Igepal CA-630, 0.7 % Na-deoxycholate, 500 mM  
318 LiCl, 5 mM Na-butyrate and 1 x protease inhibitor cocktail), once with TE buffer (10 mM Tris-  
319 HCl pH8.0, 1 mM EDTA and 50 mM NaCl) and eluted from beads with Elution buffer (50  
320 mM Tris-HCl pH 8.0, 10 mM EDTA and 1% SDS). Samples were decrosslinked for 16 hours  
321 at 65 °C in presence of 550 mM NaCl and proteinase K (Ambion), treated with RNase A  
322 (Thermo Scientific) and DNA was extracted with Phenol:Chloroform:Isoamylalcohol followed  
323 by chloroform extraction and ethanol precipitation. Sequencing libraries were prepared from  
324 10 ng of DNA with KAPA HyperPrep Kit (Roche) and paired-end sequenced with NovaSeq  
325 6000 (Illumina) to produce ~100 million fragments for each library.

326

### 327 RNAPII and MED23 ChIP-Seq

328 Cells were treated with DMSO or 500 nM dTAG-13 for 24 hours. RNAPII and MED23 ChIP-  
329 Seq samples were prepared as described above, except for MED23 samples, protein-protein  
330 crosslinking was performed by incubating cells in rotation with 2 mM disuccimidyl glutarate  
331 (Thermo Scientific; Pierce) in PBS, followed by two washes with PBS and formaldehyde  
332 fixation as above. 30 million and 10 million cells were used for RNAPII and MED23 IPs,  
333 respectively. RNAPII samples included an exogenous genome spike-in of 7.5 million S2 cells.  
334 Cell lysis was performed as above and samples were sonicated in sonication buffer (50 mM  
335 HEPES-KOH pH 7.5, 140 mM EDTA, 1 mM EDTA, 1 mM EGTA, 1 % Triton X-100, 0.1 %  
336 Na-deoxycholate, 0.1 % SDS and 1x protease inhibitors (Roche)) for 35 cycles in case of  
337 RNAPII samples and 50 cycles for MED23 samples by using Bioruptor NextGen (high setting).  
338 When preparing beads for IPs, 50 µl of Protein A Dynabeads (Invitrogen) was washed three  
339 times in blocking buffer (0.5 % BSA in PBS) and then bound to 5 µg of RNAPII antibody  
340 (8WG16; Biolegend) and 2 µg of Spike-in antibody (61686, Active Motif) or 5 µg of MED23  
341 antibody (A300-425A; Bethyl Laboratories) during an overnight incubation in blocking buffer.  
342 Antibody-conjugated beads were washed three times with blocking buffer, resuspended to 100  
343 µl of blocking buffer prior to adding them to sheared chromatin in a total volume of 2.5 ml  
344 sonication buffer for RNAPII and 1 ml for Med23. Immunoprecipitation was performed in  
345 rotation overnight in 4 °C. Beads were washed twice with sonication buffer, once with  
346 sonication buffer containing 500 nM NaCl, once with LiCl wash buffer (20 mM Tris pH 8.0,  
347 1 mM EDTA, 250 mM LiCl, 0.5 % Igepal CA-630, 0.5 % Na-deoxycholate, 1x protease  
348 inhibitors) and once with TE buffer (10 mM Tris pH 8.0, 1 mM EDTA, 1x protease inhibitors).  
349 Samples were eluted from beads with 200 µl elution buffer as above and crosslinks were  
350 reversed by incubating samples in 65 °C for 16 hours. Samples were topped up with 200 µl TE  
351 buffer and 8 µl of RNase A, incubated in 37 °C for 2 hours followed by addition of 7 µl of  
352 300 mM CaCl<sub>2</sub>, 2 µl Proteinase K (Ambion) and 30 minutes incubation in 37 °C. DNA purified  
353 from samples with phenol:chloroform:isoamyl alcohol extraction followed by ethanol  
354 precipitation. Libraries were prepared and sequenced as above for total ~50 million fragments  
355 for each library.

356

### 357 In-situ Hi-C

358 In-situ Hi-C experiments were performed for two biological replicates of TRIM28-FKBP  
359 mESCs after 24h DMSO or dTAG-13 treatments as described previously <sup>7</sup>, with minor  
360 modifications. Briefly, 3 million cells per sample were fixed in suspension with 1 %

361 formaldehyde for 10 minutes and quenched with 0.125 M glycine for 5 minutes in rotation.  
362 Cells were washed with PBS and lysed in Hi-C lysis buffer (50 mM Tris pH 7.5, 150 mM  
363 NaCl, 5 mM EDTA, 0.5% Igepal CA-630, 1.15 % Triton X-100 and 1x protease inhibitors  
364 (Roche)) for 10 minutes on ice. Nuclei were washed with cold PBS, NEBuffer 2 (NEB) and  
365 resuspended in 50 µl of 0.5 % SDS, incubated in 62 °C for 7 minutes and SDS was quenched  
366 with 145 µl water and 25 µl 10 % Triton X-100 followed by 15 min incubation in 37 °C. For  
367 restriction enzyme digestion, 25 µl of 10X NEBuffer2 and 250 U of MboI (NEB) were added  
368 and samples were incubated overnight in 37 °C, followed by additional 1-hour incubation after  
369 adding another 250 U of MboI. Enzymes were inactivated for 20 minutes in 65 °C. Samples  
370 were spun in 5000 g, 200 µl of supernatant was removed and sample was resuspended in 200  
371 µl of 1.2X NEBuffer 2. To fill-in DNA overhangs, 50 µl of fill-in buffer (37.5 µl of 0.4 mM  
372 biotin-14-dATP (Thermo Fisher, 19524016), 1.5 µl of dCTP, 1.5 µl of dGTP, 1.5 µl of dTTP,  
373 10 mM each, and 8 µl of 5U/µl DNA PolI Large (Klenow) Fragment (NEB, M0210L)) was  
374 added and the samples were incubated in 37 °C for 90 minutes. For ligation reaction, samples  
375 were topped up with 663 µl of water, 120 µl of NEB T4 DNA ligase buffer (NEB), 100 µl of  
376 10 % Triton X-100 and 12 µl of 10 mg/ml BSA (NEB, B9000S) and 2000 U of T4 DNA ligase  
377 (NEB, M0202) and incubated overnight in 18 °C in rotation. Crosslinks were reversed with  
378 Proteinase K and 0.88 % SDS in 10 mM Tris-HCl (pH 7.5) during 30 min in 55 °C, followed  
379 by incubation in 68 °C in presence of 2.3 M NaCl for 2 hours. For library preparation, DNA  
380 was extracted from samples with ethanol and sodium acetate precipitation, sheared with  
381 Covaris E220 and pulled down with 150 µl of T1 Streptavidin Dynabeads (Thermo Fisher).  
382 The end-repair for captured DNA was performed at room temperature for 30 minutes using  
383 100 µl reaction with 0.5 U of T4 Polynucleotide Kinase (NEB), 12 U of T4 DNA polymerase  
384 (NEB) 5 U of DNA pol I Large (Klenow) Fragment in NEB T4 DNA ligase buffer with 10  
385 mM ATP and 0.5 mM dNTP. After washing the bead-bound DNA, samples were resuspended  
386 to NEBuffer 2 with 0.5 mM dATP and 25 U of Klenow exo minus (NEB, M0212) and  
387 incubated in 37 °C for 30 minutes. After washing the beads, universal sequencing adapters  
388 from NEBnext Ultra DNA Library Kit (NEB) were ligated in NEB Quick ligation reaction  
389 buffer according to manufacturer's guidelines. Libraries were amplified for 6 PCR cycles and  
390 purified using Ampure XP beads (Beckman Coulter). Libraries were paired-end sequenced  
391 with NovaSeq 6000 for 400 million fragments for each library.

392

393 Generation of DNA constructs for protein purification

394 For the purification of fluorescently labeled fusion proteins we amplified the C-terminal  
395 domain of POLR2A, full-length CBX5 (HP1 $\alpha$ ), the intrinsically disordered region of MED1  
396 and the intrinsically disordered region of NFYC from cDNA generated from v6.5 mouse  
397 embryonic stem cells. The amplified fragments were cloned into pET45-mCherry (Addgene  
398 Cat# 145279) or pET45-mEGFP (this paper) backbones by Gibson assembly using  
399 NEBuilder® HiFi DNA Assembly Master Mix (NEB). All sequences of interest were cloned  
400 C-terminally to the respective fluorescence marker.

401

#### 402 Protein purification

403 Protein overexpression in BL21 (DE3) (NEB M0491S) was performed as described<sup>8</sup>. Pellets  
404 were resuspended in 25 mL of ice-cold Buffer A (50 mM Tris pH 7.5, 500 mM NaCl, 20 mM  
405 Imidazole) supplemented with cOmplete protease inhibitors (Sigma, 11697498001) and  
406 sonicated for 10 cycles (15 s ON, 45 s OFF) on a Qsonica Q700 sonicator. The resulting lysate  
407 was cleared by centrifugation at 15,500 g for 30 minutes at 4°C. For protein purification we  
408 used the Äkta Avant 25 chromatography system. The supernatant was loaded onto a cOmplete  
409 His-Tag purification column (Merck, 6781543001) pre-equilibrated in Buffer A. The loaded  
410 column was washed with 15 column volumes (CV) of Buffer A. Bound fusion protein was  
411 eluted in 10 CV of Elution Buffer (50 mM Tris pH 7.5, 500 mM NaCl, 250 mM Imidazole)  
412 and immediately diluted 1:1 in Storage Buffer (50 mM Tris pH 7.5, 125 mM NaCl, 1 mM DTT,  
413 10% Glycerol). The resulting eluate was concentrated by centrifugation at 10,000 g for 30  
414 minutes at 4°C using 3000 MWCO Amicon Ultra centrifugal filters (Merck, UFC803024). The  
415 concentrated fraction was diluted 1:100 in Storage Buffer, re-concentrated and stored at -80°C.  
416

#### 417 In vitro transcription of IAP RNA, seRNA, MSR RNA

418 To generate *in vitro* transcribed RNA for the *gag* region of IAPEz, template PCR amplicon  
419 was generated from cDNA using primers listed in [Supplementary Table 1b](#). The regions of  
420 interest cloned for in vitro transcription of the *mir290-295* super-enhancer RNA and Major  
421 Satellite Repeat RNA were previously described<sup>9,10</sup>, and the primers used are listed in  
422 [Supplementary Table 1b](#). 1 $\mu$ g of DNA was used for *in vitro* transcription using Fluorescein 12-  
423 UTP or Cy5-UTP RNA labeling kit (Jena Biosciences) and incubated at 37°C for 4 hours  
424 followed by 15mins incubation with TURBO DNaseI. Labeled RNA was purified using Clean  
425 and Concentrator Kit-5 (Zymo research) and eluted in Tris-HCl pH8.0. For *mir290-295* super-  
426 enhancer RNA, transcribed RNA of positive and negative strand was mixed 1:1 at equimolar

427 concentrations. The size IAPez GAG RNA: 820-880 bp, Major Satellite Repeat: 450-550 bp,  
428 *miR290-295* seRNA: 930 bp.

429

#### 430 In vitro droplet assay

431 For the *in vitro* droplet formation assays (Fig. 4e-j, Extended Data Fig. 7, 8), the purified  
432 mCherry- or mEGFP-fusion proteins were measured for concentration and subsequently  
433 diluted to the desired concentration in Storage Buffer (50 mM Tris pH 7.5, 125 mM NaCl, 1  
434 mM DTT, 10% Glycerol). Protein solutions were mixed with Fluorescein- or Cy5-labeled RNA  
435 and then diluted 1:1 with 20% PEG-8000 in de-ionized water (w/v). After 30 minutes of  
436 incubation at room temperature, 10  $\mu$ l of this mix was pipetted onto a chambered coverslip  
437 (Ibidi, 80826-90). Images were acquired using an LSM880 confocal microscope equipped with  
438 a Plan-Apochromat-63x/1.40 oil DIC objective with a 2.5x post-magnification if indicated.  
439 Data for the quantification of condensate formation in *in vitro* mixing assays was acquired from  
440 at least 5 images of two independent image series per condition. For the detection of droplet  
441 regions, we used the ZEN blue 3.1 Image Analysis and Intellesis software packages. Image  
442 segmentation was achieved by use of a previously trained ZEN Intellesis algorithm for  
443 classification of each individual pixel into foreground (droplet area) or background (image  
444 background). Generated probability maps with a minimal confidence of at least 90%, a  
445 minimum area of 3 pixels and watershed for primary objects were implemented into the ZEN  
446 Image Analysis module to classify regions of interest. For the calculation of the partition ratio,  
447 the mean intensity values of droplets and background for the respective channel was used.  
448 Enrichment of RNA in droplets was calculated by background subtraction from the mean  
449 intensity values of droplet areas in the respective RNA channel (Fig. 4g, 4j, Extended Data Fig.  
450 7e) or as partition ratio as described above. All figures were generated using R-Studio.

451

#### 452 RNA-Seq processing

453 Raw reads were subjected to adapter and quality trimming with cutadapt <sup>11</sup> (version 2.4;  
454 parameters: --nextseq-trim 20 --overlap 5 --minimum-length 25 --adapter  
455 AGATCGGAAGAGC -AAGATCGGAAGAGC), followed by poly-A trimming with cutadapt  
456 (parameters: --overlap 20 --minimum-length 25 --adapter "A[100]" --adapter "T[100]"). Reads  
457 were aligned to the mouse reference (mm10) using STAR <sup>12</sup> (version 2.7.5a; parameters: --  
458 runMode alignReads --chimSegmentMin 20 --outSAMstrandField intronMotif --quantMode  
459 GeneCounts) and transcripts were assembled using StringTie <sup>13</sup> (version 2.0.6; parameters: -e)

460 with GENCODE annotation (VM19). For the repeat expression quantification, reads were re-  
461 aligned with additional parameters ‘--outFilterMultimapNmax 50’.

462

#### 463 Public ChIP-Seq data

464 Fastq files of public ChIP-Seq data for H3K27Ac<sup>14</sup>, H3K9me3<sup>15</sup>, HP1 $\alpha$ <sup>16</sup>, TRIM28<sup>15</sup>,  
465 NANOG<sup>17</sup>, OCT4<sup>17</sup> and SOX2<sup>17</sup> were downloaded from GEO ([Supplementary Table 1c](#)).

466

#### 467 ChIP-Seq processing

468 Raw reads of treatment and input samples were subjected to adapter and quality trimming with  
469 cutadapt (version 2.4; parameters: --nextseq-trim 20 --overlap 5 --minimum-length 25 --  
470 adapter AGATCGGAAGAGC -A AGATCGGAAGAGC). Reads were aligned separately to  
471 the mouse genome (mm10) and to the fly genome (*D. Melanogaster*, dm6) using BWA<sup>18</sup> with  
472 the ‘mem’ command (version 0.7.17, default parameters). A sorted BAM file was obtained and  
473 indexed using samtools with the ‘sort’ and ‘index’ commands (version 1.10). Duplicate reads  
474 were identified and removed using GATK<sup>19</sup> (version 4.1.4.1) with the ‘MarkDuplicates’  
475 command and default parameters. Technical replicates of treatment and input samples were  
476 merged respectively using samtools ‘merge’. Peaks were called with reads aligning to the  
477 mouse genome only using MACS2<sup>20</sup> ‘callpeak’ (version 2.1.2; parameters --bdg --SPMR)  
478 using the input samples as control samples. For H3K9me3 only, the ‘--broad’ option was used.  
479 Genome-wide coverage tracks for single and merged replicates normalized by library size were  
480 computed using deepTools bamCoverage (parameters: --normalizeUsing CPM --extendReads)  
481 and in addition normalized by the spike-in factor obtained from the reads aligning to the  
482 *Drosophila* genome as described<sup>6</sup>.

483

484 Publicly available paired-end ChIP-Seq data (HP1 $\alpha$ ) were processed as described above except  
485 spike-in and input normalization.

486

487 Publicly available single-end ChIP-Seq data (H3K9me3, TRIM28, H3K27ac, NANOG,  
488 OCT4, SOX2) were trimmed using cutadapt (version 2.4; parameters: --nextseq-trim 20 --  
489 overlap 5 --minimum-length 25 --adapter AGATCGGAAGAGC), and aligned and de-  
490 duplicated analogous to the paired-end data. In order to estimate the fragment size, only reads  
491 with a mapping quality of at least 15 were considered and used as input for spp<sup>21</sup> (version  
492 1.2.2). All reads were then used to create coverage tracks using bamCoverage and to call



493 peaks with MACS2 ‘callpeak’ (version 2.1.2; parameters --bdg --SPMR --nomodel) with ‘--  
494 extsize’ set to the estimated fragment length divided by two and input samples used as  
495 control for H3K27ac, NANOG, OCT4 and SOX2. For H3K9me3 only, the ‘--broad’ and ‘--  
496 nolambda’ options were used.

497

498 The co-ordinates displayed for ChIP-Seq tracks in figures all correspond to mm10 genome  
499 assembly co-ordinates.

500

#### 501 Detection of eRNA expression and preparation of TT-SLAM-Seq histograms

502 TT-SLAM-Seq signal was quantified at typical enhancer and SE constituents. Enhancers  
503 within 3kb of TSS were excluded and intragenic enhancers were only considered on opposing  
504 strand relative to genes (GENCODE VM19, excluding “bidirectional\_promoter\_lncRNA”) to  
505 measure eRNA without interference from gene transcription. Gene coordinates were  
506 extended for 10kb from transcription termination site to prevent overlap of transcriptional  
507 readthrough signal. The detection of eRNA was performed at 2 kb regions centered by the  
508 constituent coordinates. TT-SLAM-Seq counts were quantified from .bam files with htseq-  
509 count (parameters: --stranded = yes, --nonunique = all). Differential expression analysis was  
510 performed on enhancer elements with DEseq2<sup>22</sup> (parameters: test="LRT", reduced=~1) and  
511 excluding regions with less than 10 counts across samples. For visualizing fold changes,  
512 regions with low eRNA expression (FPKM < 1) were excluded (Fig. 1i). In Fig. 1i, enhancer  
513 constituents with significant transcription (FPKM > 1) are considered (n = 117 for super-  
514 enhancers, n = 153 for typical enhancers).

515

516 Quantifications for eRNA histograms were done with HOMER software<sup>23</sup> (version 4.10) and  
517 only intergenic enhancers were considered. Reads from .bam files were prepared for  
518 quantifications with ‘makeTagDirectory’, three replicates were merged, and histograms for  
519 enhancer and SE constituents were prepared with ‘annotatePeaks.pl’ (parameters: -size 4000,  
520 -hist 50) and metagene plots for SEs with ‘makeMetaGeneProfile.pl’ (parameters: -min 500, -  
521 size 4000). Histograms were smoothed by taking a rolling mean with window size 5 for  
522 enhancer constituents and 3 for SEs before plotting. To visualize TT-SLAM-Seq signal across  
523 genes, protein-coding genes were considered and metagene plot was prepared using  
524 ‘makeMetaGeneProfile.pl’ after removing outliers (FPKM <0.5 or >100). Histograms were

525 smoothed by taking a rolling mean with window size 3 before plotting (Supplementary Fig.  
526 3c).

527

528 To compare relative levels of eRNAs and transcripts derived from repeat elements (Extended  
529 Data Fig. 1d), reads were prepared for quantifications using ‘makeTagDirectory’ with -  
530 keepOne option, allowing multimapping reads to be considered only once. Reads at intergenic  
531 retrotransposons belonging to LTR class (Rebase<sup>24</sup>) were quantified using  
532 ‘analyzeRepeats.pl’ and LTRs with less than 5 reads across 0h and 24h samples were discarded.  
533 To analyze putative upregulated LTRs (“UP LTRs”), differential expression was estimated  
534 using DESeq2 (parameters: test="LRT", reduced=~1). LTRs with fold change above 2 and  
535 adjusted p-value < 0.05 were considered. To visualize TT-SLAM-Seq signal, coverage tracks  
536 from both strands were prepared from HOMER TagDirectories with ‘makeUCSCfile’,  
537 converted to bigwig format using ‘bedGraphToBigWig’ and metaprofile plots were prepared  
538 using EnrichedHeatmap<sup>25</sup> as described for ChIP-Seq below.

539

540 To quantify eRNA expression from total RNA-Seq data (Fig. 4c), aligned reads were prepared  
541 for quantification with HOMER ‘makeTagDirectory’ and quantified with ‘analyzeRepeats.pl’  
542 using the enhancer constituents defined above. Mean FPKM values from three replicates were  
543 calculated for each enhancer and regions with low read counts (FPKM < 0.05) were excluded  
544 from analysis.

545

#### 546 Differential gene expression analysis

547 For the differential gene expression analysis only protein coding genes were considered.  
548 Differential expression for RNAseq and TT-SLAM-Seq samples was measured using DESeq2  
549 (parameters: test="LRT", reduced=~1) based on the raw counts per gene considering all time  
550 points per experiment type in one design. Only genes with at least 10 reads across all samples  
551 of the same experiment type were considered for the analysis. Genes with an absolute log2 fold  
552 change greater than 1 in comparison to the DMSO control and an adjusted p-value of less than  
553 0.05 were termed differentially expressed per time point. Lowly expressed genes across all  
554 time points (average TPM across all RNAseq samples of less than 0.5 or average FPKM across  
555 all TT-SLAM-Seq samples of less than 0.25) were excluded from the analysis.

556

#### 557 Gene set enrichment (GSEA) analysis

558 GSEA was performed to test if super-enhancer (SE) associated genes were overrepresented in  
559 the sets of TT-SLAM-Seq differentially regulated genes. All protein-coding genes were ranked  
560 based on log<sub>2</sub> fold change. To prepare a gene set for the GSEA, Refseq IDs of SE-associated  
561 genes obtained from <sup>26</sup> were converted to (version free) Ensembl gene IDs using biomaRt R  
562 package <sup>27</sup>. GSEA was run with the fgsea R package <sup>28</sup> using 100000 permutations (Fig. 1h).

563

#### 564 Mappability

565 The genome-wide mappability was calculated using GenMap <sup>29</sup> (parameters: -K 100 -E 0 -t -  
566 w -bg) with the mouse genome (mm10) as input (Supplementary Fig. 1c-g).

567

#### 568 ChIP-Seq enrichment analysis

569 Bigwig tracks of ChIP-Seq signal were imported into R with the package rtracklayer <sup>30</sup>.  
570 Enriched heatmaps and metaprofile plots of ChIP-Seq signal were generated using the R  
571 package EnrichedHeatmap <sup>25</sup>. For this purpose, the signal was normalized to genomic features  
572 using the function ‘normalizeToMatrix’ (parameters: extend = c(2000, 2000), mean\_mode =  
573 “w0”, w = 50, target\_ratio = 0.25). The resulting data matrix was visualized using the function  
574 ‘EnrichedHeatmap’.

575

#### 576 Hi-C data processing and analysis

577 Raw reads were trimmed for adapters and quality as described above. Reads were further  
578 trimmed at MboI restriction site using cutadapt (version 2.4; parameters: -a GATC, --  
579 minimum-length 25) and separately aligned to the mouse genome (mm10) using BWA <sup>18</sup>  
580 ‘mem’ (version 0.7.17, default parameters). Replicates were processed individually and then  
581 merged with samtools ‘merge’ <sup>31</sup>. Remainder of Hi-C data processing was performed with  
582 HOMER software <sup>23</sup> (version 4.10), unless specified otherwise. Paired-end reads were matched  
583 and prepared for analysis with ‘makeTagDirectory’ and PCR duplicates were removed  
584 (parameters: -tbp 1). Reads were filtered to remove continuous genomic fragments, re-ligation  
585 events, self-ligations and tags from regions with unusually high tag density while keeping only  
586 paired-end reads where both reads have a MboI restriction site within the fragment length  
587 estimate 3’ to the read (parameters: -removePEbg -restrictionSite GATC -both -  
588 removeSelfLigation -removeSpikes 10000 5).

589

590 Analysis of compartments was performed with HOMER ‘runHiCpca.pl’ using resolution of 25  
591 kb, 50 kb analysis window and using H3K27Ac peaks to assign active (A) and inactive (B)

592 compartments. Hi-C matrices were prepared for visualization with ‘analyzeHiC’ by  
593 normalizing counts to interactions per hundred square kilobases per billion (default) or  
594 displaying log<sub>2</sub> observed/expected counts normalized for interaction distance (parameters: -  
595 distNorm). Resolutions used were 300 kb for whole chromosome view ([Supplementary Fig.  
596 6a](#)), 150kb resolution and 300 kb ‘window’ for region chr12:3,600,000-35,800,000  
597 ([Supplementary Fig. 6b, left](#)) and in displaying differential (dTAG-13 - DMSO) of  
598 observed/expected matrix ([Supplementary Fig. 6b, right](#)), 10 kb resolution for region  
599 chr15:38,300,000-39,800,000 ([Supplementary Fig. 6c](#)), 25 kb resolution for region chr7:  
600 26,037,000-31,262,000 in ([Supplementary Fig. 8a](#)) and 5kb resolution and 20kb ‘window’ for  
601 region chr7:29,260,000-30,000,000 in ([Supplementary Fig. 8b](#)). Images were prepared with  
602 Treeview 3.0

603

604 To perform pile-up analysis from ERV-gene and ERV-super-enhancer contacts, HOMER  
605 formatted Hi-C data was converted first to .hic format with ‘tagDir2hicFile.pl’ and then to .cool  
606 format with ‘hic2cool convert’ (version 0.8.3). Pile-up analysis was performed with  
607 ‘coolpup.py’ (version 0.9.5) software <sup>32</sup> using Knight-Ruiz balanced matrices with 50 kb  
608 resolution and analyzing all cis interactions between ERVs and super-enhancers and between  
609 ERVs and protein coding genes, excluding genes with low expression (FPKM < 0.25 across  
610 TT-SLAM-Seq samples).

611

### 612 Motif enrichment

613 Enrichment of motifs was calculated using ame (version 5.3.0, default parameters) <sup>33</sup>. The  
614 sequences of 5’ full length IAP LTRs and full length IAP inner parts were analyzed separately  
615 using the sequences of super-enhancer constituents as control ([Extended Data Fig. 4b](#)). In  
616 [Extended Data Fig. 4b](#), the top TFs whose motifs show enrichment in the IAP LTRs or inner  
617 parts are shown. Also displayed is the expression level of the TFs calculated from the RNA-  
618 Seq data. For further functional tests, NFY was selected as its motif is highly enriched in IAPs,  
619 and it is expressed above 50 TPM in mESCs.

620

### 621 Genotyping

622 Genotyping was performed as described <sup>34</sup>. Briefly, samples were aligned against a hybrid  
623 mouse assembly (mm10 with positions of SNPs with the CAST/Eij strain masked as ‘N’ using  
624 SNPsplit <sup>35</sup> using STAR (parameters: --outSAMattributes NH HI NM MD). Reads were sorted  
625 by reference genome using SNPsplit. SNPs identified in <sup>34</sup> to be covered by reads from both

626 genomic backgrounds were used to determine the allele composition for each cell. Individual  
627 cells were then assigned to embryos using the autosomal distribution of CAST/Eij SNPs. In  
628 order to determine embryo sex, marker genes *Xist*, *Erdr1*, *Ddx3y* and *Eif2s3y* were used to  
629 evaluate X and Y chromosome transcription based on the counts produced by Cell Ranger.  
630 Embryos were determined to be female if they had a high fraction of cells expressing *Xist*,  
631 while embryos with a high fraction of cells expressing *Erdr1*, *Ddx3y* and *Eif2s3y* were  
632 determined to be male. Cells that could not confidently be assigned to an embryo were  
633 discarded from the analysis.

634

### 635 Wild-type reference

636 In order to define clusters of cells for the wild-type embryos, the R package Seurat (v3.2.3)<sup>36</sup>  
637 was used. For each time point (E5.5, E6.5 and E7.0), the 3000 most variable genes were  
638 detected across all cells and embryos. All time points were integrated using the functions  
639 ‘FindIntegrationAnchors’ and ‘IntegrateData’ (parameters: dims = 1:20). The combined wild-  
640 type time points were log2-normalized (‘NormalizeData’) and scaled while accounting for  
641 potential bias from cell cycle or mitochondrial gene counts using the function ‘ScaleData’ with  
642 parameters ‘vars.to.regress = c(‘percent.mt’, ‘S.Score’, ‘G2M.Score’)’. A UMAP was used to  
643 represent the cells in two dimensions using the function ‘RunUMAP’ (parameters: reduction =  
644 ‘pca’, dims = 1:20) based on the PCA computed by the function ‘RunPCA’ (parameters: npcs =  
645 30). Six clusters of cells were identified using the functions ‘FindNeighbors’ (parameters:  
646 reduction = ‘pca’, dims = 1:20) and ‘FindClusters’ (parameters: resolution = 0.1). Marker genes  
647 per cluster were identified with the ‘FindAllMarkers’ function (parameters: only.pos = TRUE,  
648 min.pct = 0.25, logfc.threshold = 0.25). Based on the detected marker genes per cluster and  
649 literature-based markers of cell states we assigned clusters to the following cell states: epiblast,  
650 primitive streak, extraembryonic ectoderm (ExE)/trophoblast, visceral endoderm, mesoderm  
651 and parietal endoderm ([Supplementary Table 6](#)). The heatmap of marker genes per cell state  
652 was generated based on the z-score transformed log2-normalized counts using the function  
653 ‘DoHeatmap’ ([Extended Data Fig. 10f](#)).

654

### 655 Knockout assignment

656 The E6.5 TRIM28 knockout expression data were log2-normalized analogous to the wild-type  
657 time points and transferred to the combined wild-type reference using the functions  
658 ‘FindTransferAnchors’ (parameters: dims = 1:30) and ‘TransferData’ (parameters: dims = 1:30)  
659 based on the cell states identified in the wild-type. Wild-type and knockout samples were

660 integrated using 'FindIntegrationAnchors' and 'IntegrateData' (parameters: dims = 1:20,  
661 k.filter = 50). Analogous to the wild-type reference, the combined dataset was scaled and a  
662 UMAP was used in order to represent the data in two dimensions (same parameters for all  
663 functions as for the wild-type reference).

664

#### 665 Cell state proportions

666 Per embryo, the proportion of a cell state was computed as the number of cells assigned to a  
667 cell state divided by the total number of cells assigned to the respective embryo. Per time point,  
668 cell state proportions were represented by the median of proportions of the respective cell state  
669 across all embryos of a developmental time point (Fig. 5d, Supplementary Fig. 9a-b).

670

#### 671 RNA velocity

672 RNA velocity was computed using velocityto (v0.1.18)<sup>37</sup>, visualized using scanpy (v1.4.3)<sup>38</sup>,  
673 and projected on the wild-type reference UMAP (Extended Data Fig. 10e).

674

#### 675 Cut site analysis

676 Cut site analysis of the guide RNA target regions was performed using the sequence reads from  
677 the E6.5 wild type and E6.5 TRIM28 KO embryos, as described previously<sup>34</sup>. The aligned  
678 reads were then classified according to their alignment to the sgRNA target site as follows: (1)  
679 'spliced/deleted' if they did not match any nucleotide but spanned the entire target site, (2)  
680 'mismatched' if any of the nucleotides were aligned as a mismatch/deletion/insertion to the  
681 reference, (3) 'complete' if all nucleotides matched the target site (Extended Data Fig. 10b).

682

#### 683 Pluripotency and differentiation marker quantification

684 For the pluripotency and differentiation marker genes, TPMs were z-score transformed and  
685 visualized using the R package and function pheatmap [Kolde (2019) pheatmap: Pretty  
686 Heatmaps. R package version 1.0.12. <https://CRAN.R-project.org/package=pheatmap>]  
687 (Supplementary Fig. 11b-c).

688 **Supplementary Figure Legends**

689

690

691 **Supplementary Fig. 1. TRIM28 occupies ERVs but not enhancers and promoters in**  
692 **mESCs**

693 **a.** Classes of retrotransposons in the mouse

694 **b.** (top) Model of TRIM28/HP1 $\alpha$  pathway and its major regulators at endogenous  
695 retroviruses (ERVs). KRAB-ZFP: KRAB-Zinc Finger Protein, TRIM28: Tripartite motif -  
696 containing protein 28, HP1 $\alpha$ : heterochromatin protein 1 $\alpha$ . (bottom) Model of enhancers.  
697 Enhancers are bound by transcription factors (TFs) that recruit the Mediator complex and  
698 RNA Polymerase II (RNAPII).

699 **c-j.** Heatmap representation of ChIP-seq read densities of the indicated factors within a 2kb  
700 window around the indicated genomic features. The genomic features (the middle part of the  
701 plot) were length normalized. Meta-analyses of the mean binding profile of the indicated  
702 factors are displayed above the heatmaps. Enhancers in mESCs are bound by the OCT4,  
703 SOX2, NANOG TFs, and are devoid of components of the TRIM28/HP1 $\alpha$  pathway that are  
704 bound at ERVs. For transposable elements, the mappability information is displayed on the  
705 right. Rpm: reads per million.

706 **Supplementary Fig. 2. Extended characterization of TRIM28-FKBP ESCs**

707 **a.** Scheme of FKBP knock-in strategy at the *Trim28* locus.

708 **b.** Western blot validation of the FKBP degron tag and its ability to degrade TRIM28. Actin  
709 is shown as the loading control.

710 **c.** Mass spectrometry analysis of protein levels after 24h of dTAG-13 treatment. Every dot  
711 corresponds to a quantified protein. The degradation appears highly selective for TRIM28.

712 **d.** Scheme of directed differentiation to Epiblast stem cells (EpiSCs), induced Extra-  
713 embryonic stem cells (iXEN) and Neural Progenitor cells (NPCs). Differentiation  
714 experiments were performed with TRIM28-FKBP mESC clone 1.

715 **e.** EpiSCs can be derived from TRIM28-FKBP ESCs. Representative bright field images  
716 demonstrating the morphology of undifferentiated mESCs and derived EpiSCs.  
717 Differentiation was performed three times independently. Images displayed from one  
718 representative experiment Scale bar is 200 $\mu$ m.

719 **f.** iXEN can be derived from TRIM28-FKBP ESCs. Flow cytometry analysis of PDGFRA  
720 expression in undifferentiated mESCs and derived iXEN cells. The dotted line indicates the  
721 gating strategy used to categorize the population as negative or positive. The barplot depicts  
722 the percentage of PDGFRA positive cells that correspond to each condition. The experiment  
723 was performed in triplicates, and a representative quantification is shown.

724 **g.** TRIM28-FKBP ESCs can be differentiated to NPCs. Marker gene expression in parental  
725 line, TRIM28-FKBP mESC, and NPCs derived from TRIM28-FKBP mESC. Heatmap  
726 representation of RNA-seq read density (TPM) log<sub>2</sub> fold change (across 3 replicates for each)  
727 of pluripotency and neural marker gene expression.

728 **h.** Scheme of tetraploid complementation assay. TRIM28-FKBP mESC was treated with  
729 dTAG-13 for 24 hours prior to aggregation. dTAG-13/DMSO was added to the aggregation  
730 media.

731 **i.** TRIM28-FKBP ESCs contribute to the ICM (inner cell mass)/pluripotent lineage, which is  
732 not observed in prolonged presence of dTAG-13. In blastocyst stage embryos, morphology  
733 and mRUBY expression were determined. The expression of mRUBY identifies TRIM28-  
734 FKBP ESCs. The dotted line represents the ICM (inner cell mass), the embryo's pluripotent  
735 lineage. Experiment was performed in triplicates and the 'n/n' denotes the number of  
736 embryos that showed mRUBY staining / the number of embryos profiled. Scale bar is 20 $\mu$ m.



737 **j.** Scheme of the SSEA-1 staining experiments. SSEA-1 is a marker of pluripotent cells.  
738 Withdrawal of LIF in the cell culture medium leads to differentiation, and is included as a  
739 control.

740 **k.** 24h of dTAG-13 treatment does not substantially change the fraction of cells expressing  
741 the SSEA-1 pluripotency marker. Displayed are representative images of SSEA-1-Cy5 from  
742 one immunofluorescence experiment. Scale bars: 50 $\mu$ m.

743 **l.** FKBP allele knock-in has no effect on the pluripotent state of ESCs. Flow cytometry  
744 analysis of the respective pluripotency marker SSEA-1-stained cell lines. The dashed line  
745 denotes the gating for low and high SSEA-1 expression, respectively. The percentage of cells  
746 expressing high levels of SSEA-1 is indicated by the numbers.

747 **m.** Western blot validation of the levels of the pluripotency TF OCT4 in two independent  
748 TRIM28-FKBP mESC clones.

749 **n.** TRIM28-FKBP ESCs have a similar transcriptional profile to parental V6.5 cells. The  
750 heatmap demonstrates a strong correlation between parental and knock-in ESCs (Pearson  
751 correlation). Correlation coefficients were calculated between ESCs and NPCs using a set of  
752 6,736 differentially expressed genes.

753 **Supplementary Fig. 3. TT-SLAM-Seq detects nascent transcription**

754 **a.** Schematic overview of the TT-SLAM-Seq experimental and analytical procedure.

755 **b.** TT-SLAM-Seq and H3K27Ac ChIP-Seq browser tracks at the *Klf4* super-enhancer locus.

756 Rpm: reads per million. Co-ordinates are mm10 genome assembly co-ordinates.

757 **c.** TT-SLAM-Seq detects nascent transcription at genes, enhancers and super-enhancers.

758 Displayed are meta representations of TT-SLAM-Seq read densities from + and – strands at

759 genes, super-enhancers, constituent enhancers of super-enhancers, and enhancers in mESCs.

760 The genomic features at genes and super-enhancers were length normalized. Reads are

761 normalized to  $10^7$  mapped reads and displayed as tags per bp per peak.

762 **Supplementary Fig. 4. Retrotransposon de-repression in TRIM28-degraded ESCs**

763 **a.** Classes of retrotransposons in the mouse.

764 **b.** Transcript levels of ERVs, LINEs and SINEs detected with TT-SLAM-Seq and RNA-Seq  
765 upon dTAG-13 treatment in mESCs. Values are normalized to the levels detected at 0h. Data  
766 are from three biological replicates.

767 **c.** Transcript levels of ERV (sub)classes detected with TT-SLAM-Seq and RNA-Seq upon  
768 dTAG-13 treatment in mESCs. Values are normalized to the levels detected at 0h. Data are  
769 from three biological replicates.

770 **d.** Transcript levels of IAP subfamilies detected with TT-SLAM-Seq and RNA-Seq upon  
771 dTAG-13 treatment in mESCs. Values are normalized to the levels detected at 0h. Data are  
772 from three biological replicates.

773 **e.** Transcript levels of the indicated ERV taxa detected with TT-SLAM-Seq and RNA-Seq  
774 upon dTAG-13 treatment in mESCs. Values are normalized to the levels detected at 0h. Data  
775 are from three biological replicates.

776 **f.** qRT-PCR analysis of *IAPeZ* RNA levels upon dTAG-13 treatment in mESCs. Values are  
777 normalized to the levels detected at 0h. Data are from three independent biological replicates  
778 (i.e. three wells on a tissue culture plate), and are presented as mean values +/- SD. The  
779 experiment was repeated three times. P-values are from two-tailed t-tests. \*:P=0.023,  
780 \*\*\*:P<10<sup>-3</sup>.

781 **g.** Reduced H3K9me3 at IAPs, MMERVkS and MMETns in dTAG-13 treated (24h) mESCs.  
782 Displayed are heatmap representations of H3K9me3 ChIP-seq read densities within a 2kb  
783 window around the indicated genomic features. The genomic features (the middle part of the  
784 plot) were length normalized. Meta-analyses of the mean binding profile of the indicated  
785 factors are displayed above the heatmaps. Rpm: reads per million.

786 **Supplementary Fig. 5. Reduced occupancy of transcription-associated factors at super-**  
787 **enhancers and increased occupancy at ERVs in TRIM28-degraded mESCs**

788 **a.** Genome browser tracks of ChIP-Seq data (H3K27Ac, RNAPII, MED23) in control mESCs  
789 and upon 24h dTAG-13 treatment at the *miR290-295* locus. Rpm: reads per million.

790 **b.** Heatmap and meta representations of H3K27Ac, MED23 and RNAPII ChIP-Seq read  
791 densities at IAP, MMERVK and MMETn ERVs in control (DMSO) and dTAG-13 (24h)  
792 treated mESCs. The mean read densities are displayed +/-2kb around the indicated elements.  
793 The genomic elements (the middle part of the meta plot) were length normalized.

794 **Supplementary Fig. 6. Characterization of gene expression at the *Cthrc1* locus after**  
795 **CRISPR/Cas9-mediated deletion of three ERVs**

796 **a.** The *Cthrc1* locus, highlighting the three ERVs that are deleted in the ERV TKO mESC  
797 line. TRIM28 ChIP-Seq data is shown above the gene models.

798 **b.** Genotyping PCR of the ERV TKO cell line. Genotyping was performed once.

799 **c.** Chromatin contacts at the *Cthrc1* locus. Displayed is the interaction matrix from in-situ Hi-  
800 C experiment from DMSO control samples. Positions of gene coordinates are displayed  
801 below the matrix and genes analyzed in **d-e** are annotated. A thick white stripe in the  
802 interaction matrix represents an error in mm10 genome assembly.

803 **d.** RT-qPCR analysis showing relative expression of *Cthrc1*-proximal genes in ERV TKO  
804 cell line from six biological replicates. Bar charts depict the mean and error bars standard  
805 deviation.

806 **e.** RT-qPCR analysis of gene expression of *Cthrc1* and proximal genes in response to 24h  
807 dTAG-13 treatment from six biological replicates. *IAPez* and *pri-MiR290-295* are shown as  
808 controls. Values are normalized to the DMSO control. Bar charts depict the mean and error  
809 bars standard deviation. P-values are from two-tailed t-tests.

810 **Supplementary Fig. 7. TRIM28-degradation leads to shift of ERVs from the inactive**  
811 **“B” towards the active “A” compartment**

812 **a.** TRIM28-degradation does not lead to major genome-wide changes in chromatin contacts.  
813 Displayed are the Hi-C interaction matrices for chromosome 12, and the Principal  
814 Component 1 (PC1) of the normalized interaction matrix of the DMSO control and dTAG-  
815 treated samples.

816 **b.** (left) Hi-C interaction matrices for chromosome 12, zoomed-in on an ERV cluster, and the  
817 Principal Component 1 (PC1) of the normalized interaction matrix of the DMSO control and  
818 dTAG-treated samples. (right) differential interaction matrix of the region shown on the left.

819 **c.** TRIM28-degradation leads to a shift of ERVs from the inactive “B” towards the active “A”  
820 compartment. Quantification of the change in mean compartment score of the indicated  
821 genomic regions. UP-LTRs are the putative upregulated ERVs displayed in [Extended Data](#)  
822 [Fig. 1d](#), UP and DOWN genes are the differentially regulated genes from [Fig. 1g](#) (24h), non-  
823 DE genes are active genes not differentially expressed. One thousand largest H3K9me3 peaks  
824 were considered as an additional control. The values are displayed as the difference between  
825 the PC1 value in the dTAG-treated sample and the DMSO control sample. The number of  
826 elements in each category is shown in parentheses.

827 **d.** Pile-up analysis of contacts between IAPs, MMERVKs, MMETns, UP-LTRs (see above),  
828 and (top) transcribed genes or (bottom) super-enhancers (SEs) in wild type and TRIM28-  
829 degraded mESCs. The “all ERVs set” includes the combination of IAPs, MMERVKs and  
830 MMETns.

831 **Supplementary Fig. 8. A shift towards the active “A” compartment at the *Zfp84* locus**  
832 **a.** Chromatin data at a portion of chromosome 7. The following data are displayed from top  
833 to bottom: genome co-ordinates (mm10), position of ERV elements, Hi-C Principal  
834 Component 1 (PC1) in the control (DMSO-treated) mESCs, PC1 in dTAG-13 -treated  
835 mESCs, TRIM28 ChIP-Seq data. The normalized Hi-C interaction matrix of the DMSO  
836 control and dTAG-treated samples is shown below the TRIM28 ChIP-Seq track. Note a shift  
837 of PC1 into the positive direction at loci enriched for ERV elements (highlighted with  
838 arrowheads).

839 **b.** Zoom-in of the region highlighted in panel ‘a’, at the MERVK-rich *Zfp84* locus. The  
840 following data are displayed from top to bottom: genome co-ordinates (mm10), position of  
841 LTR ERV elements, gene models, TT-SLAM-Seq data (0h, and 24h dTAG-13 -treated cells),  
842 H3K27Ac ChIP-Seq (0h, and 24h dTAG-13 -treated cells), MED23 ChIP-Seq (0h, and 24h  
843 dTAG-13 -treated cells), H3K9me3 ChIP-Seq (0h, and 24h dTAG-13 -treated cells), TRIM28  
844 ChIP-Seq. The normalized Hi-C interaction matrix of the DMSO control and dTAG-treated  
845 samples is shown below the TRIM28 ChIP-Seq track. Note a shift toward active chromatin  
846 marks and increased contact frequency at the ERV elements highlighted with arrowheads.

847 **Supplementary Fig. 9. Cell state proportions in individual embryos reveal depletion of**  
848 **epiblast cells in E6.5 TRIM28 KO mouse embryos**

849 **a.** (top) Cell state proportions in each embryo from the E5.5 (left), E6.5 (middle), and E7.0  
850 (right) developmental stages analyzed in scRNA-Seq experiments. (bottom) Cell state  
851 proportions in E6.5 TRIM28 KO embryo analyzed in scRNA-Seq experiments.

852 **b.** Combined cell state proportions per embryonic stage.



853 **Supplementary Fig. 10. Loss of pluripotency markers in TRIM28 KO blastocysts**

854 **a.** The cells in the inner part of TRIM28 KO blastocysts are populated by cells that express  
855 reduced levels of OCT4 and KLF4. Displayed are representative immunofluorescence images  
856 of OCT4 and KLF4 in E3.5 wild type and TRIM28 KO blastocysts across three independent  
857 perturbation experiments with ~ 15 embryos per condition. Nuclei are stained with DAPI.  
858 Scale bars: 20µm.

859 **b.** The cells in the inner part of TRIM28 KO blastocysts are populated by cells that express  
860 reduced levels of SOX2. Displayed are representative immunofluorescence images of SOX2  
861 in E3.5 wild type and TRIM28 KO blastocysts across three independent perturbation  
862 experiments with ~ 15 embryos per condition. Nuclei are counterstained with DAPI. Scale  
863 bars: 20µm.

864 **Supplementary Fig. 11. Long term TRIM28 degradation induces differentiation**  
865 **markers in ESCs**

866 **a.** 96h of TRIM28 degradation leads to an increased fraction of cells with reduced expression  
867 of the SSEA-1 pluripotency marker. Displayed are representative FACS profiles of cell  
868 populations treated for the indicated times with dTAG-13 from two biological replicates.

869 **b.** Upregulation of differentiation marker genes upon dTAG-13 treatment in mESCs.  
870 Displayed is a heatmap representation of RNA-Seq read density (TPM) Z scores across three  
871 biological replicates for the indicated genes. The annotation on the right indicates whether a  
872 gene is identified as differentially expressed at the indicated time points relative to the level  
873 at 0h.

874 **c.** Upregulation of 2C marker genes upon dTAG-13 treatment in mESCs. Displayed is a  
875 heatmap representation of RNA-Seq read density (TPM) Z scores across three biological  
876 replicates for the indicated genes. The annotation on the right indicates whether a gene is  
877 identified as differentially expressed at the indicated time points relative to the level at 0h.

878 **Supplementary Table Legends**

879

880 **Table S1. List of reagents and datasets**

881 **a.** RNA FISH probes

882 **b.** Primers used in the study

883 **c.** GEO accession IDs of public data used in the study

884

885 **Table S2. Feature annotations**

886 **a.** full length IAPs (coordinates in mm10 genome assembly coordinates)

887 **b.** full length MMERVKs (coordinates in mm10 genome assembly coordinates)

888 **c.** full length MMETns (coordinates in mm10 genome assembly coordinates)

889 **d.** Full length LINES (coordinates in mm10 genome assembly coordinates)

890 **e.** All IAP LTRs (coordinates in mm10 genome assembly coordinates)

891 **f.** mESC enhancers (OSN constituent enhancers) (coordinates in mm10 genome assembly  
892 coordinates)

893 **g.** mESC super-enhancers (coordinates in mm10 genome assembly coordinates)

894 **h.** mESC typical enhancer (coordinates in mm10 genome assembly coordinates)

895

896 **Table S3. Mass-spectrometry data**

897 This table contains the mass spectrometry data used in [Extended Data Fig. 5d](#) and  
898 [Supplementary Fig. 2c](#).

899

900 **Table S4. TT-SLAM-Seq fold change data (genes)**

901 This table contains the fold change values used in [Fig. 1g](#).

902

903 **Table S5. TT-SLAM-Seq fold change data (enhancers)**

904 This table contains the fold change values used in [Fig. 1i](#).

905

906 **Table S6. Marker genes in scRNA-Seq clusters**

907 This table contains information on the marker genes used to identify clusters in the scRNA-  
908 Seq data.

909 **Supplementary References**

910

- 911 1 Wernig, M. *et al.* A drug-inducible transgenic system for direct reprogramming of  
912 multiple somatic cell types. *Nature biotechnology* **26**, 916-924, doi:10.1038/nbt1483  
913 (2008).
- 914 2 Artus, J. & Hadjantonakis, A. K. Generation of chimeras by aggregation of embryonic  
915 stem cells with diploid or tetraploid mouse embryos. *Methods in molecular biology*  
916 **693**, 37-56, doi:10.1007/978-1-60761-974-1\_3 (2011).
- 917 3 Kulak, N. A., Pichler, G., Paron, I., Nagaraj, N. & Mann, M. Minimal, encapsulated  
918 proteomic-sample processing applied to copy-number estimation in eukaryotic cells.  
919 *Nature methods* **11**, 319-324, doi:10.1038/nmeth.2834 (2014).
- 920 4 Ni, Y. *et al.* Mutations in NDUFS1 Cause Metabolic Reprogramming and Disruption  
921 of the Electron Transfer. *Cells* **8**, doi:10.3390/cells8101149 (2019).
- 922 5 Martens, L. *et al.* PRIDE: the proteomics identifications database. *Proteomics* **5**,  
923 3537-3545, doi:10.1002/pmic.200401303 (2005).
- 924 6 Orlando, D. A. *et al.* Quantitative ChIP-Seq normalization reveals global modulation  
925 of the epigenome. *Cell reports* **9**, 1163-1170, doi:10.1016/j.celrep.2014.10.018  
926 (2014).
- 927 7 Rao, S. S. *et al.* A 3D map of the human genome at kilobase resolution reveals  
928 principles of chromatin looping. *Cell* **159**, 1665-1680, doi:10.1016/j.cell.2014.11.021  
929 (2014).
- 930 8 Basu, S. *et al.* Unblending of Transcriptional Condensates in Human Repeat  
931 Expansion Disease. *Cell* **181**, 1062-1079 e1030, doi:10.1016/j.cell.2020.04.018  
932 (2020).
- 933 9 Henninger, J. E. *et al.* RNA-Mediated Feedback Control of Transcriptional  
934 Condensates. *Cell* **184**, 207-225 e224, doi:10.1016/j.cell.2020.11.030 (2021).
- 935 10 Huo, X. *et al.* The Nuclear Matrix Protein SAFB Cooperates with Major Satellite  
936 RNAs to Stabilize Heterochromatin Architecture Partially through Phase Separation.  
937 *Molecular cell* **77**, 368-383 e367, doi:10.1016/j.molcel.2019.10.001 (2020).
- 938 11 Martin, M. Cutadapt removes adapter sequences from high-throughput sequencing  
939 reads. *2011* **17**, 3, doi:10.14806/ej.17.1.200 (2011).
- 940 12 Dobin, A. *et al.* STAR: ultrafast universal RNA-seq aligner. *Bioinformatics* **29**, 15-21,  
941 doi:10.1093/bioinformatics/bts635 (2013).
- 942 13 Pertea, M. *et al.* StringTie enables improved reconstruction of a transcriptome from  
943 RNA-seq reads. *Nature biotechnology* **33**, 290-295, doi:10.1038/nbt.3122 (2015).
- 944 14 Ji, X. *et al.* Chromatin proteomic profiling reveals novel proteins associated with  
945 histone-marked genomic regions. *Proceedings of the National Academy of Sciences of*  
946 *the United States of America* **112**, 3841-3846, doi:10.1073/pnas.1502971112 (2015).
- 947 15 Elsasser, S. J., Noh, K. M., Diaz, N., Allis, C. D. & Banaszynski, L. A. Histone H3.3  
948 is required for endogenous retroviral element silencing in embryonic stem cells.  
949 *Nature* **522**, 240-244, doi:10.1038/nature14345 (2015).
- 950 16 Bulut-Karslioglu, A. *et al.* Suv39h-dependent H3K9me3 marks intact  
951 retrotransposons and silences LINE elements in mouse embryonic stem cells.  
952 *Molecular cell* **55**, 277-290, doi:10.1016/j.molcel.2014.05.029 (2014).
- 953 17 Whyte, W. A. *et al.* Master transcription factors and mediator establish super-  
954 enhancers at key cell identity genes. *Cell* **153**, 307-319,  
955 doi:10.1016/j.cell.2013.03.035 (2013).

956 18 Li, H. & Durbin, R. Fast and accurate short read alignment with Burrows-Wheeler  
957 transform. *Bioinformatics* **25**, 1754-1760, doi:10.1093/bioinformatics/btp324 (2009).

958 19 McKenna, A. *et al.* The Genome Analysis Toolkit: a MapReduce framework for  
959 analyzing next-generation DNA sequencing data. *Genome research* **20**, 1297-1303,  
960 doi:10.1101/gr.107524.110 (2010).

961 20 Zhang, Y. *et al.* Model-based analysis of ChIP-Seq (MACS). *Genome biology* **9**,  
962 R137, doi:10.1186/gb-2008-9-9-r137 (2008).

963 21 Kharchenko, P. V., Tolstorukov, M. Y. & Park, P. J. Design and analysis of ChIP-seq  
964 experiments for DNA-binding proteins. *Nature biotechnology* **26**, 1351-1359,  
965 doi:10.1038/nbt.1508 (2008).

966 22 Love, M. I., Huber, W. & Anders, S. Moderated estimation of fold change and  
967 dispersion for RNA-seq data with DESeq2. *Genome biology* **15**, 550,  
968 doi:10.1186/s13059-014-0550-8 (2014).

969 23 Heinz, S. *et al.* Simple combinations of lineage-determining transcription factors  
970 prime cis-regulatory elements required for macrophage and B cell identities.  
971 *Molecular cell* **38**, 576-589, doi:10.1016/j.molcel.2010.05.004 (2010).

972 24 Jurka, J. *et al.* Repbase Update, a database of eukaryotic repetitive elements.  
973 *Cytogenet Genome Res* **110**, 462-467, doi:10.1159/000084979 (2005).

974 25 Gu, Z., Eils, R., Schlesner, M. & Ishaque, N. EnrichedHeatmap: an R/Bioconductor  
975 package for comprehensive visualization of genomic signal associations. *BMC*  
976 *genomics* **19**, 234, doi:10.1186/s12864-018-4625-x (2018).

977 26 Hnisz, D. *et al.* Super-enhancers in the control of cell identity and disease. *Cell* **155**,  
978 934-947, doi:10.1016/j.cell.2013.09.053 (2013).

979 27 Durinck, S., Spellman, P. T., Birney, E. & Huber, W. Mapping identifiers for the  
980 integration of genomic datasets with the R/Bioconductor package biomaRt. *Nature*  
981 *protocols* **4**, 1184-1191, doi:10.1038/nprot.2009.97 (2009).

982 28 Korotkevich, G., Sukhov, V. & Sergushichev, A. Fast gene set enrichment analysis.  
983 *bioRxiv*, 060012, doi:10.1101/060012 (2019).

984 29 Pockrandt, C., Alzamel, M., Iliopoulos, C. S. & Reinert, K. GenMap: ultra-fast  
985 computation of genome mappability. *Bioinformatics* **36**, 3687-3692,  
986 doi:10.1093/bioinformatics/btaa222 (2020).

987 30 Lawrence, M., Gentleman, R. & Carey, V. rtracklayer: an R package for interfacing  
988 with genome browsers. *Bioinformatics* **25**, 1841-1842,  
989 doi:10.1093/bioinformatics/btp328 (2009).

990 31 Ramirez, F., Dundar, F., Diehl, S., Gruning, B. A. & Manke, T. deepTools: a flexible  
991 platform for exploring deep-sequencing data. *Nucleic acids research* **42**, W187-191,  
992 doi:10.1093/nar/gku365 (2014).

993 32 Flyamer, I. M., Illingworth, R. S. & Bickmore, W. A. Coolpup.py: versatile pile-up  
994 analysis of Hi-C data. *Bioinformatics* **36**, 2980-2985,  
995 doi:10.1093/bioinformatics/btaa073 (2020).

996 33 McLeay, R. C. & Bailey, T. L. Motif Enrichment Analysis: a unified framework and  
997 an evaluation on ChIP data. *BMC Bioinformatics* **11**, 165, doi:10.1186/1471-2105-11-  
998 165 (2010).

999 34 Grosswendt, S. *et al.* Epigenetic regulator function through mouse gastrulation.  
1000 *Nature* **584**, 102-108, doi:10.1038/s41586-020-2552-x (2020).

1001 35 Krueger, F. & Andrews, S. R. SNPsplit: Allele-specific splitting of alignments  
1002 between genomes with known SNP genotypes. *F1000Res* **5**, 1479,  
1003 doi:10.12688/f1000research.9037.2 (2016).

1004 36 Stuart, T. *et al.* Comprehensive Integration of Single-Cell Data. *Cell* **177**, 1888-1902  
1005 e1821, doi:10.1016/j.cell.2019.05.031 (2019).

1006 37 La Manno, G. *et al.* RNA velocity of single cells. *Nature* **560**, 494-498,  
1007 doi:10.1038/s41586-018-0414-6 (2018).  
1008 38 Wolf, F. A., Angerer, P. & Theis, F. J. SCANPY: large-scale single-cell gene  
1009 expression data analysis. *Genome biology* **19**, 15, doi:10.1186/s13059-017-1382-0  
1010 (2018).  
1011

# Supplementary Fig. 1

## a Retrotransposon classification (mouse)

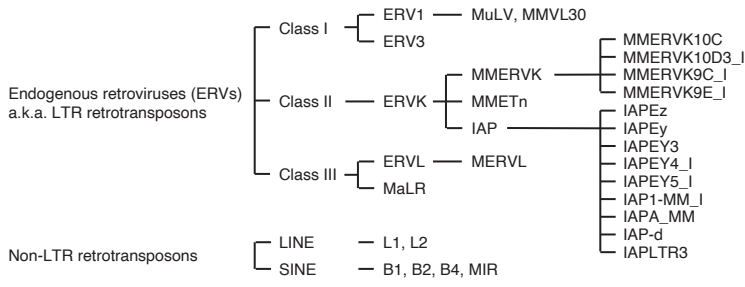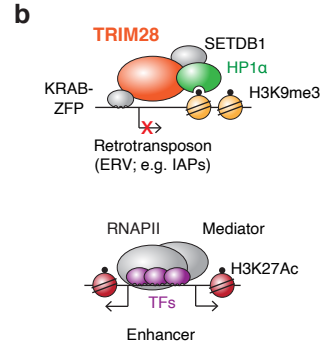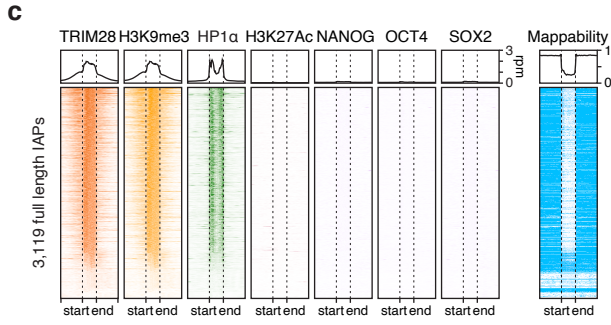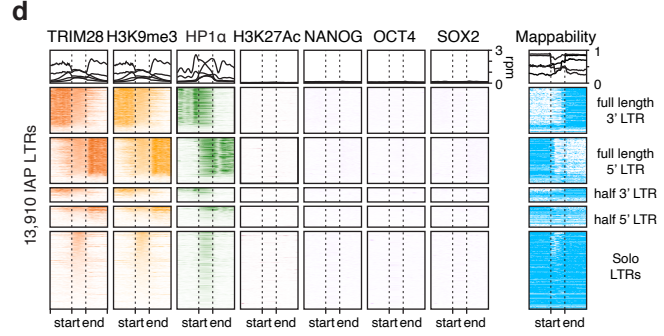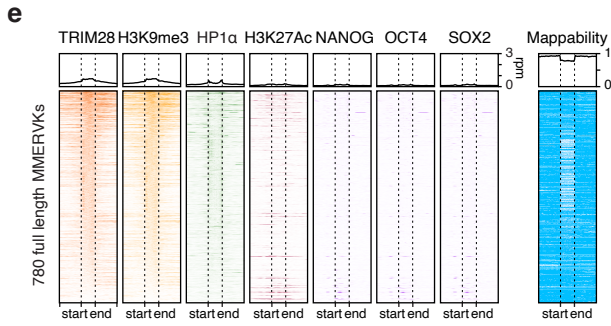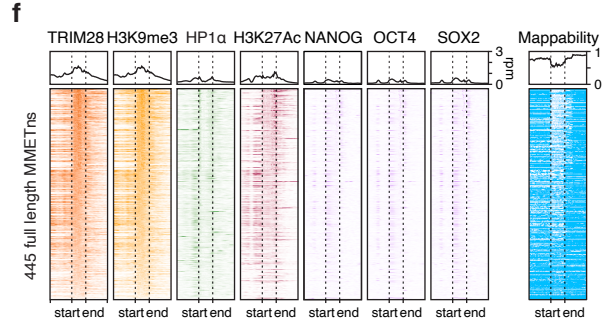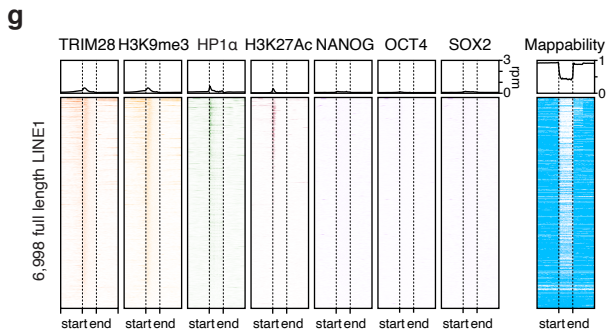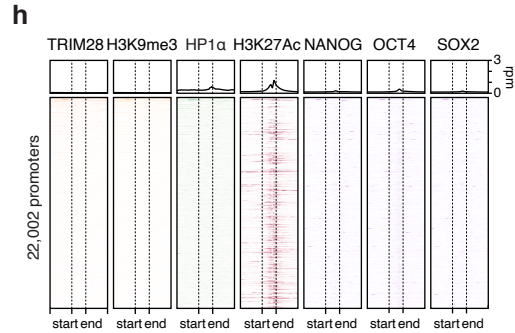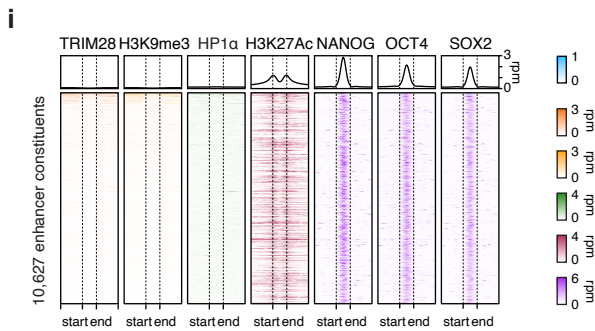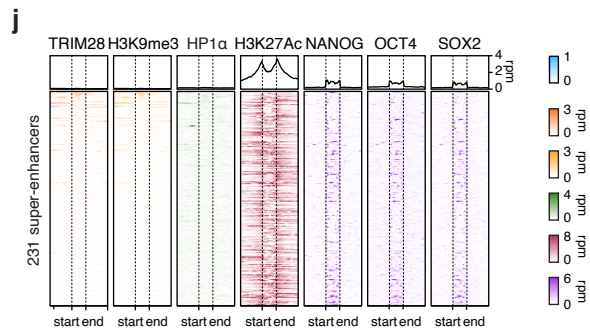

## Supplementary Fig. 2

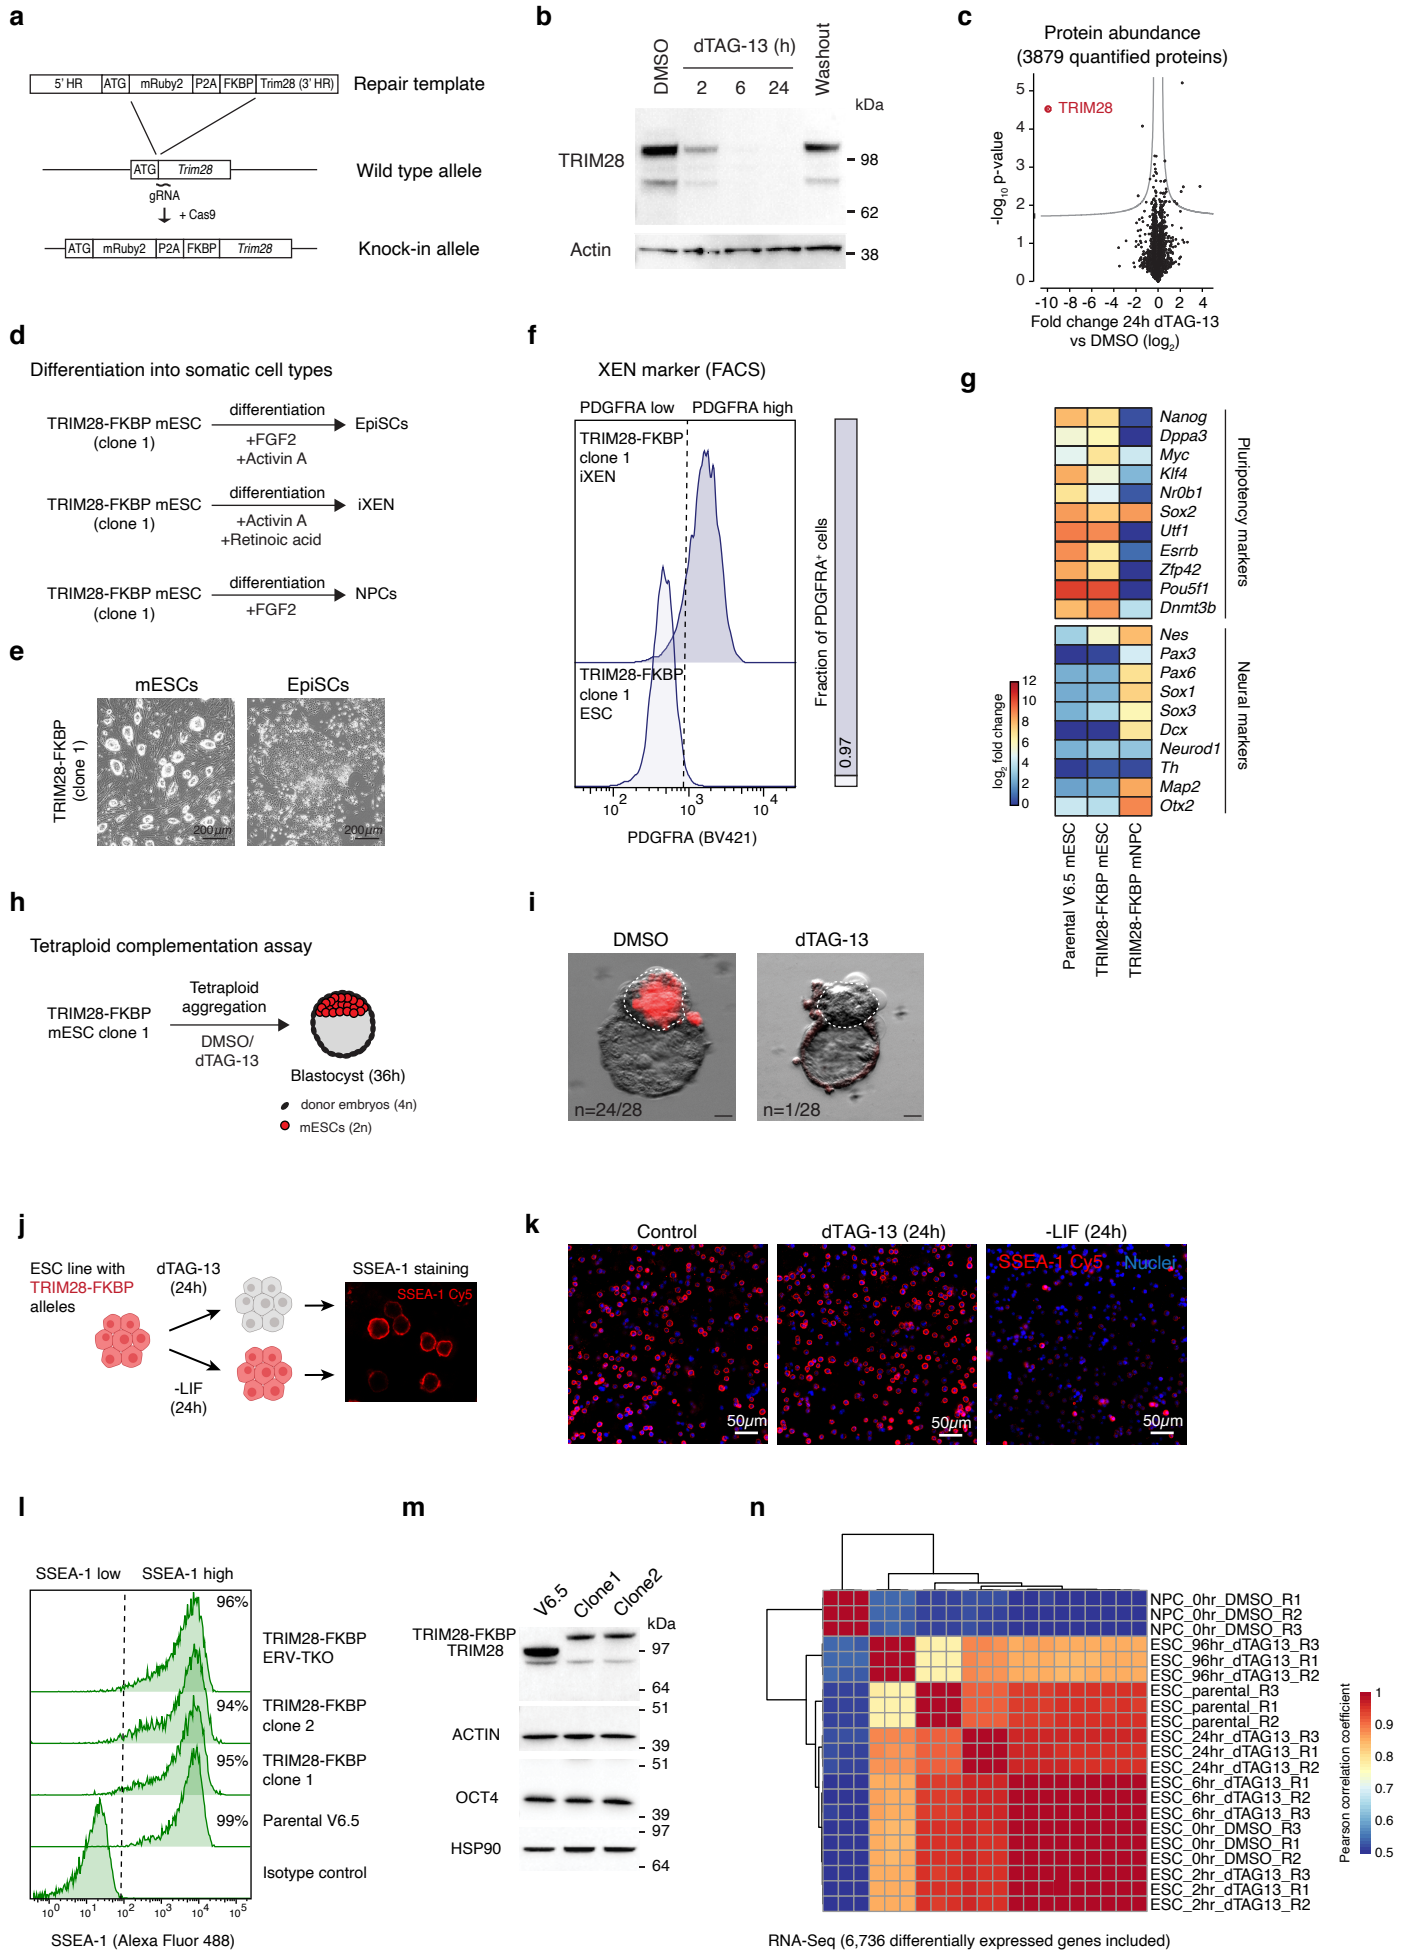



### Supplementary Fig. 3

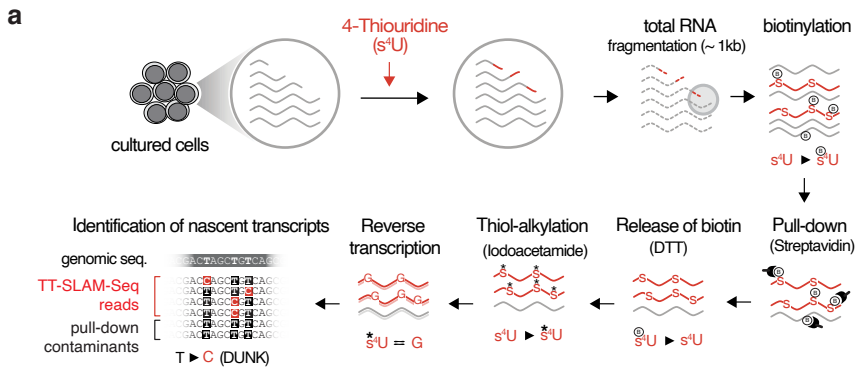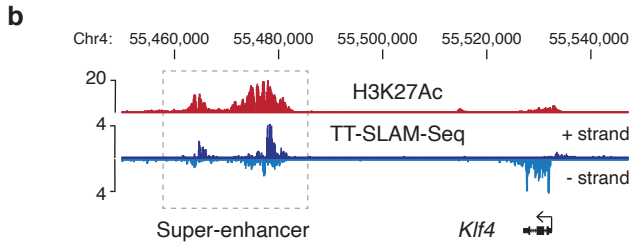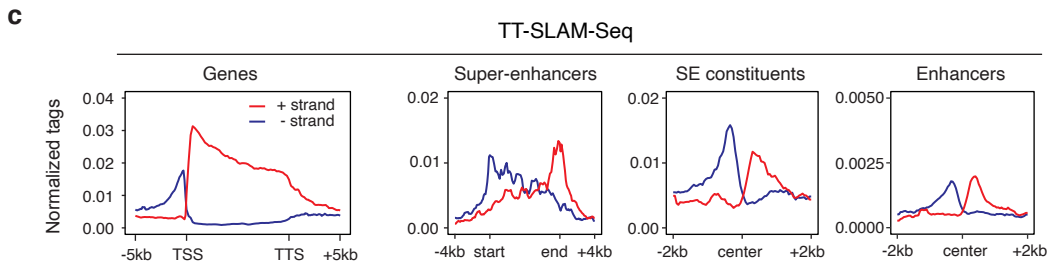

# Supplementary Fig. 4

**a**

Retrotransposon classification (mouse)

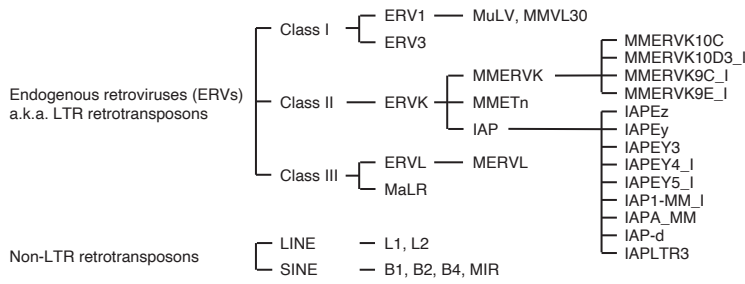

**b**

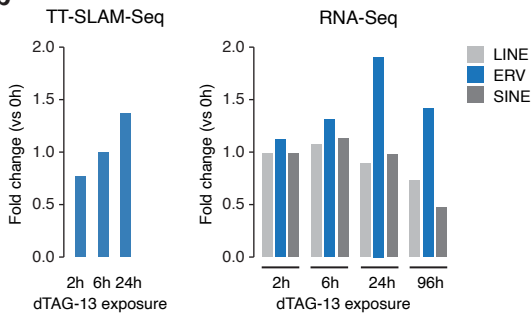

**c**

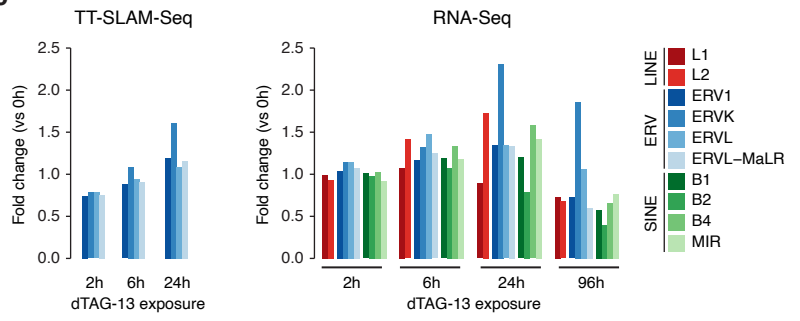

**d**

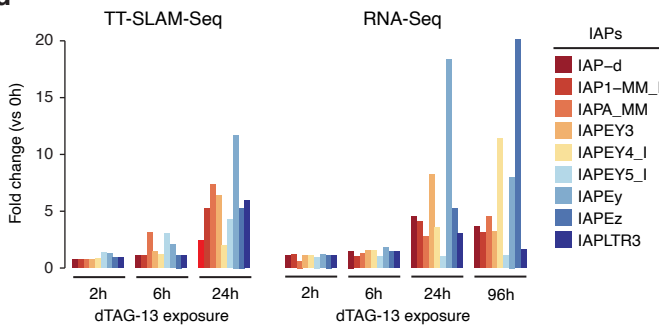

**e**

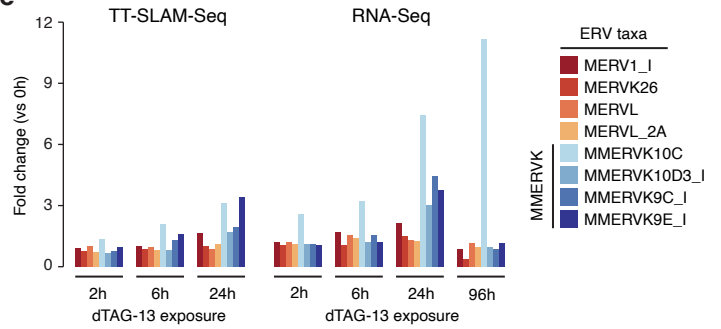

**f**

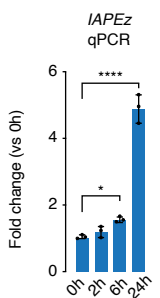

**g**

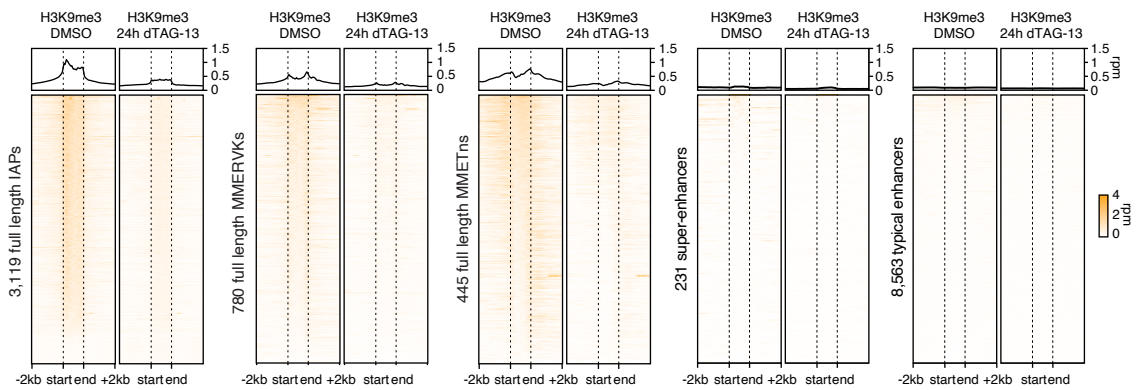

# Supplementary Fig. 5

**a**

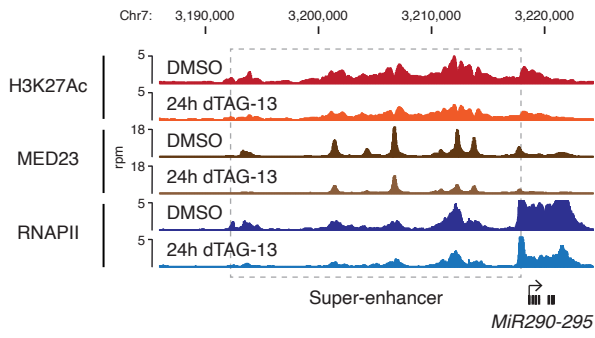

**b**

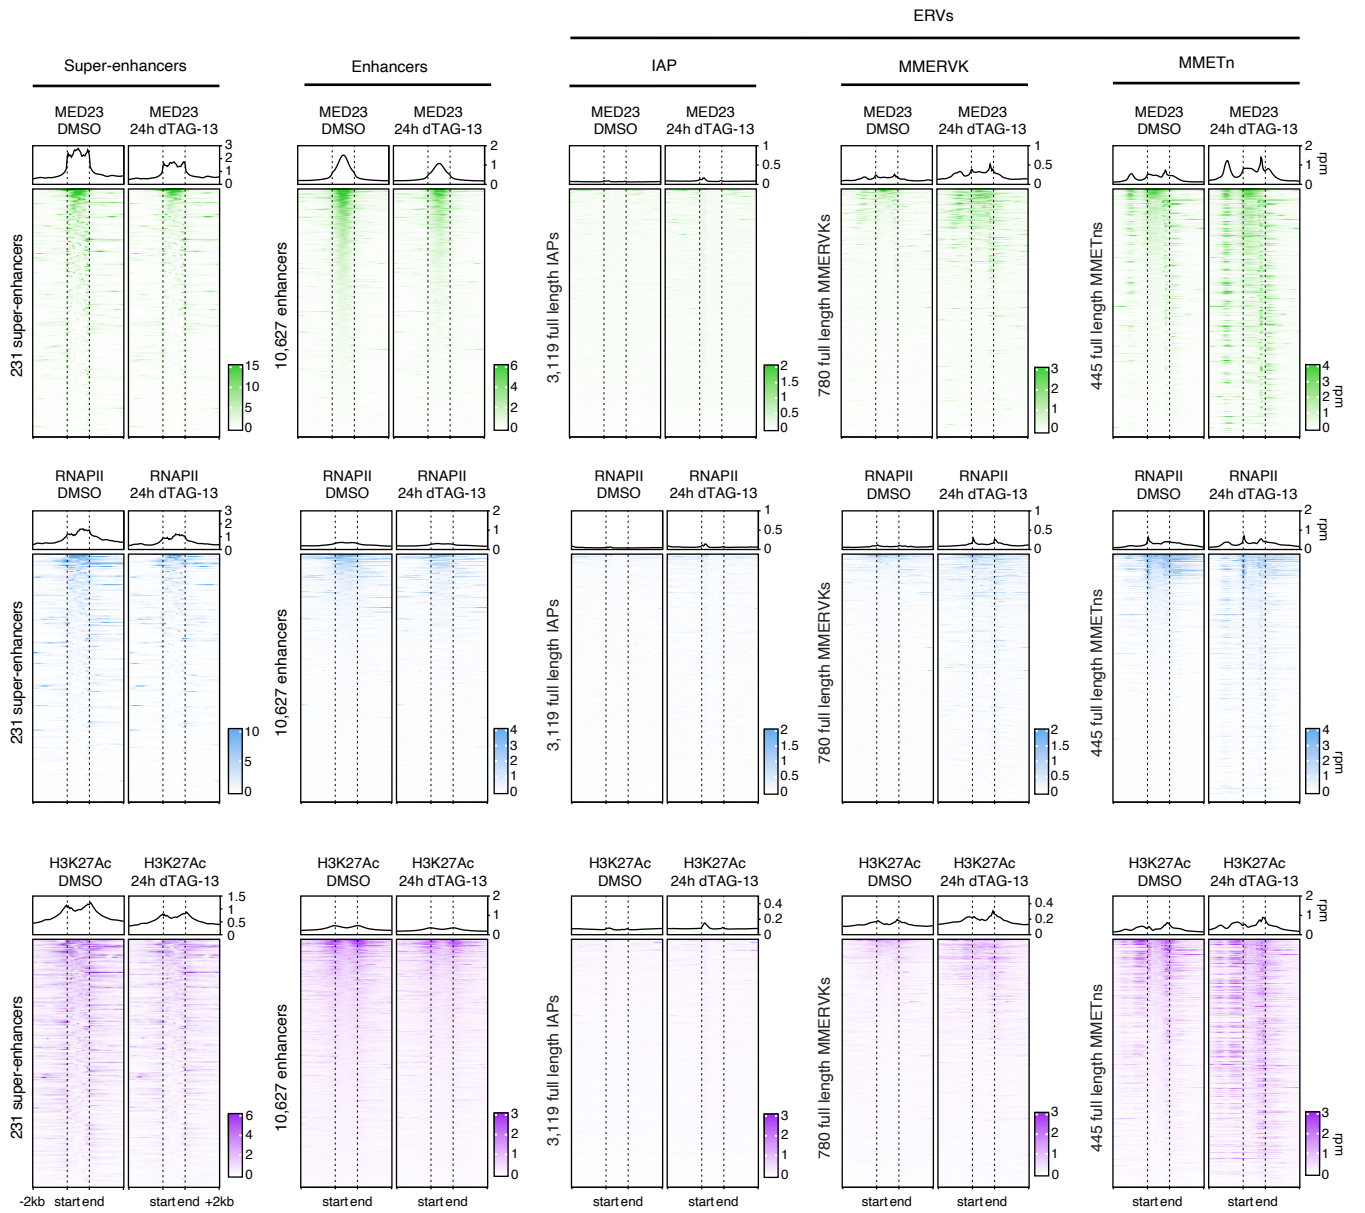

# Supplementary Fig. 6

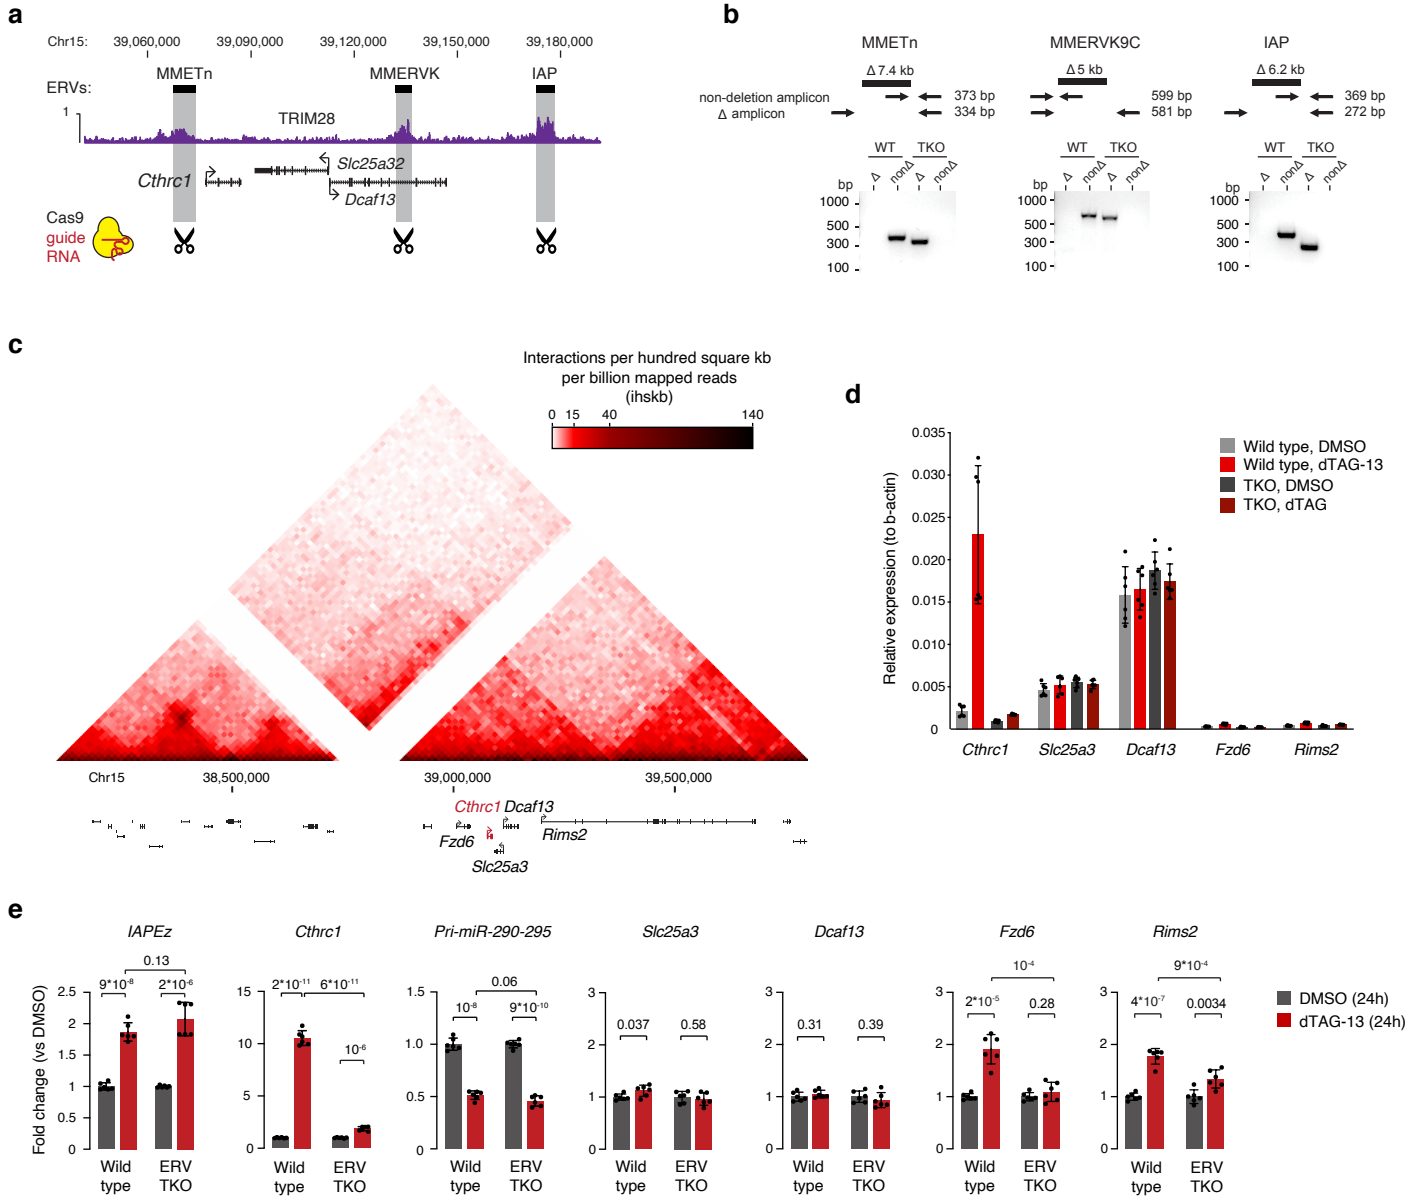

# Supplementary Fig. 7

**a**

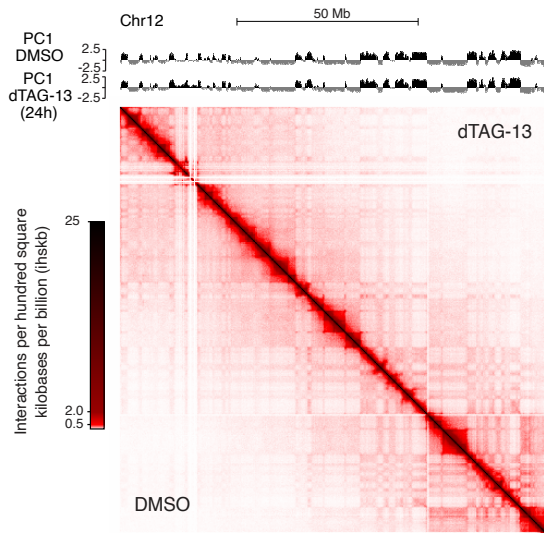

**b**

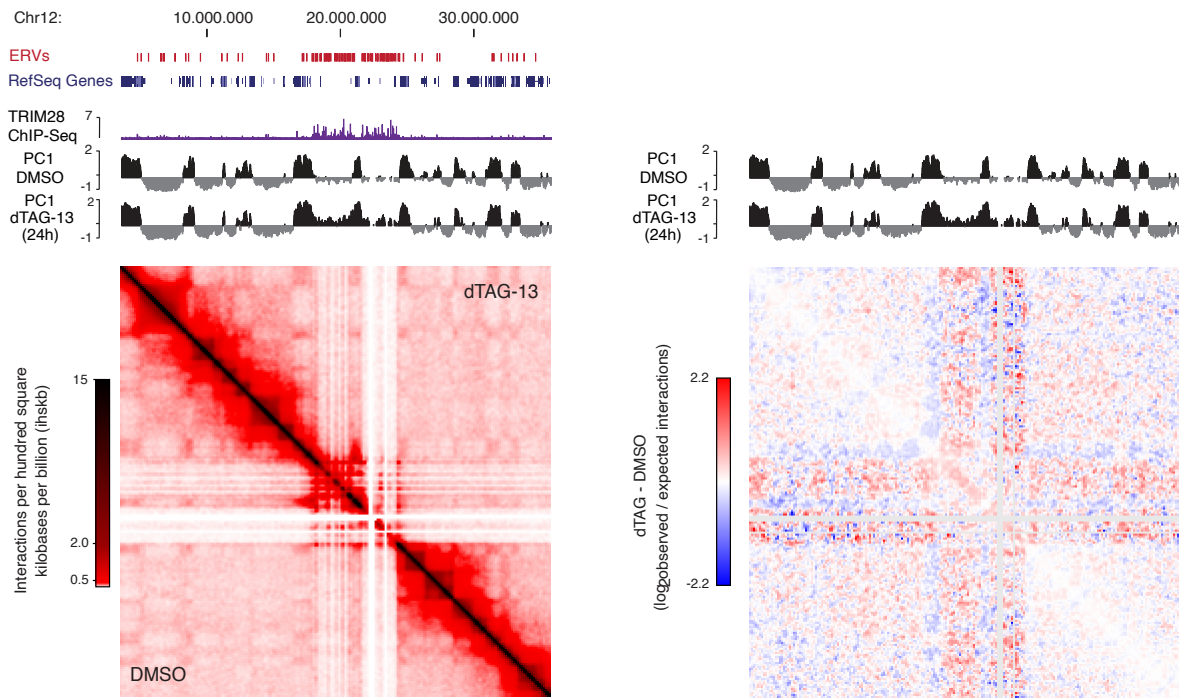

**c**

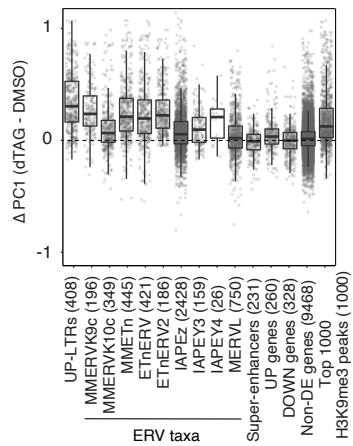

**d**

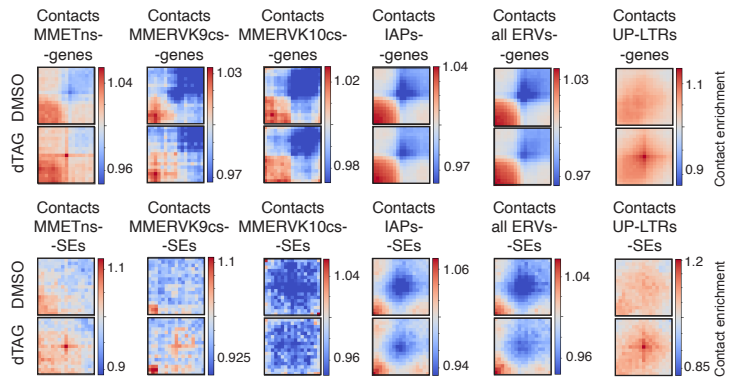



## Supplementary Fig. 9

**a**

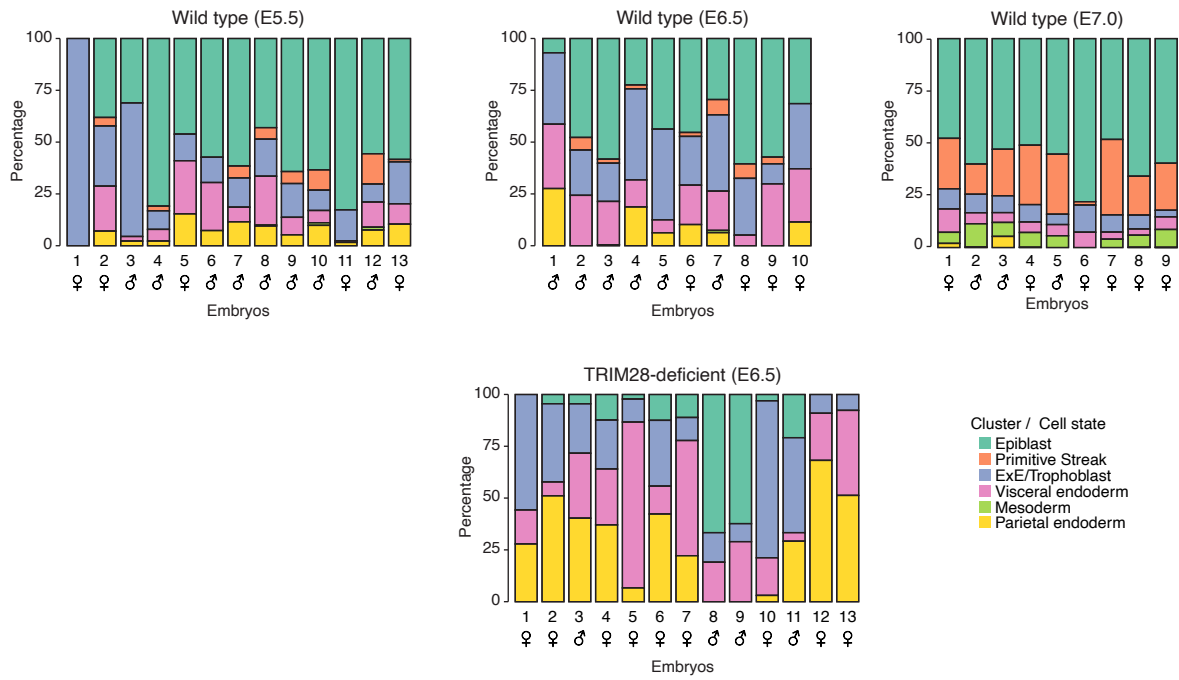

**b**

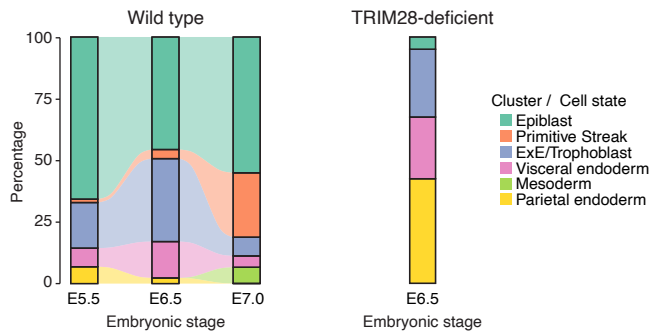

# Supplementary Fig. 10

**a**

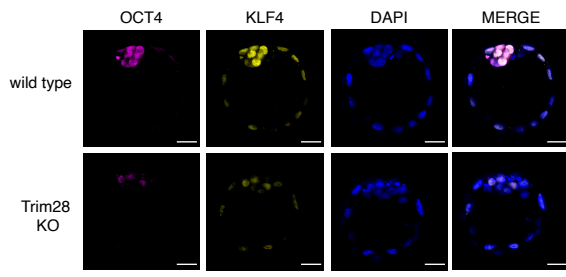

**b**

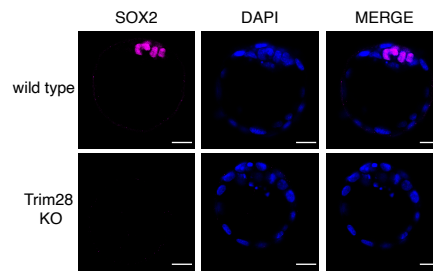



# Supplementary Fig. 11

**a**

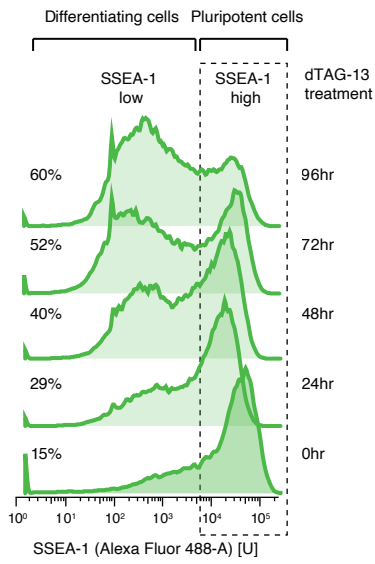

**b**

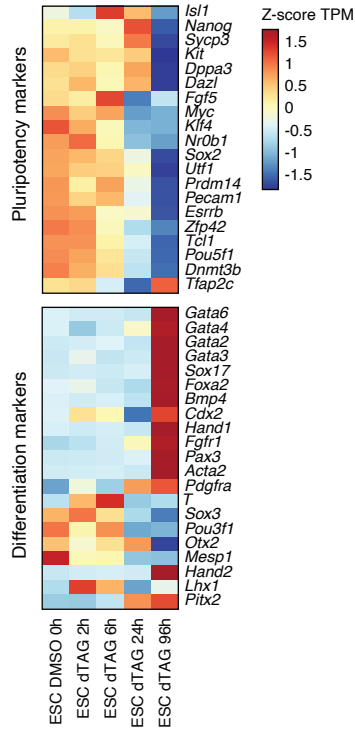

**c**

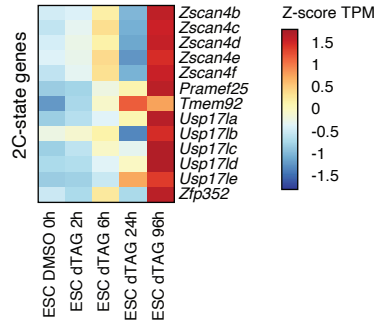

Supplement: 41588_2022_1132_MOESM1_ESM.pdf [file 41588_2022_1132_MOESM1_ESM.pdf]
