# Supplementary material for: Hijacking of transcriptional condensates by endogenous retroviruses
Source: PubMed Central journal article supplement (PMC9355880; doi:10.1038/s41588-022-01132-w), 2022-07-21

Supplementary Data 1

Uncropped data of gel images from Supplementary Figure 2b

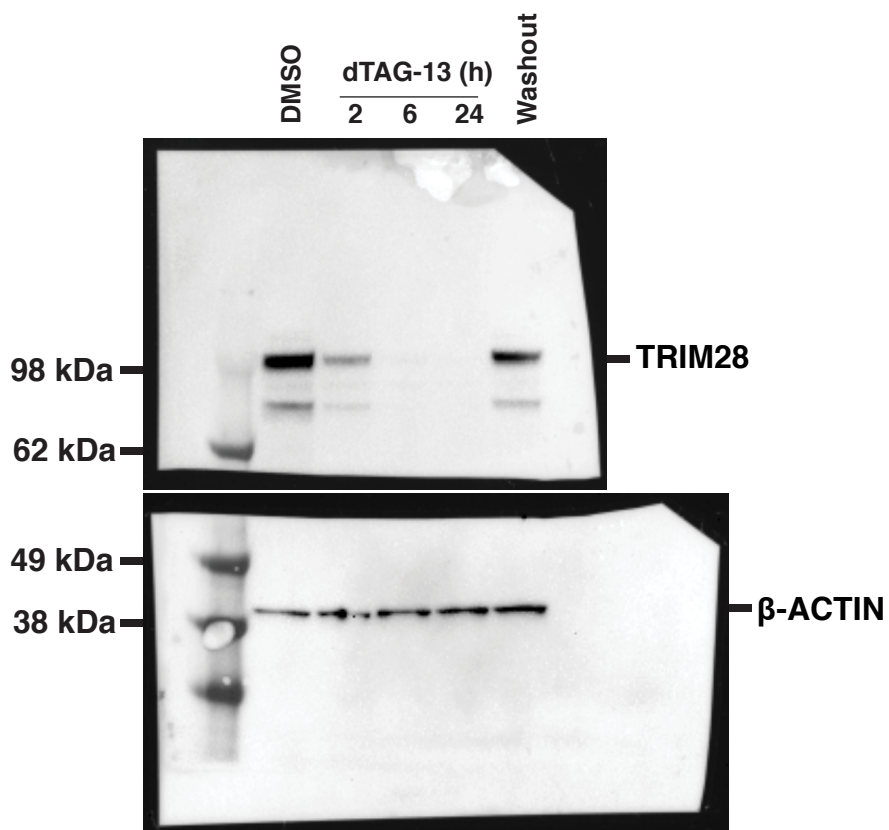

Supplement: 41588_2022_1132_MOESM5_ESM.pdf [file 41588_2022_1132_MOESM5_ESM.pdf]
