# Supplementary material for: Hijacking of transcriptional condensates by endogenous retroviruses
Source: PubMed Central journal article supplement (PMC9355880; doi:10.1038/s41588-022-01132-w), 2022-07-21

Supplementary Data 3

Uncropped gel image from Supplementary Figure 6b

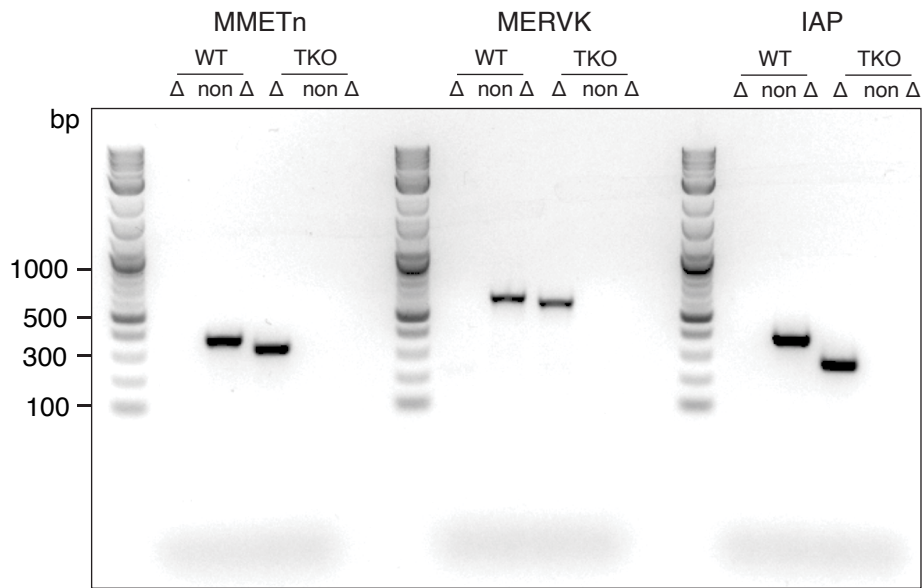

Supplement: 41588_2022_1132_MOESM7_ESM.pdf [file 41588_2022_1132_MOESM7_ESM.pdf]
